# Supplementary material
Source: PubMed Central journal article supplement (PMC6331211)
Supplement: NIHMS884666-supplement-Appendix.pdf [file NIHMS884666-supplement-Appendix.pdf]

Review Table. Methods for 273 accelerometer articles included in the review

|    | First author<br>Year | Study name | Age range<br>or Mean (SD) | N Final<br>accelerometer<br>sample | ActiGraph<br>model | Epoch<br>length<br>(seconds) | Minutes of<br>zeros to define<br>non-wear | Valid Hours<br>in a day<br>(minimum) | Valid Days<br>(+ weekends)<br>(minimum) | MVPA<br>cut point | Sedentary<br>cut point | Reporting<br>score <sup>a</sup> |
|----|----------------------|------------|---------------------------|------------------------------------|--------------------|------------------------------|-------------------------------------------|--------------------------------------|-----------------------------------------|-------------------|------------------------|---------------------------------|
| 1  | Adams 2009           |            | 11-16                     | 28                                 | 7164               | ---                          | 30                                        | 10                                   | <i>unclear</i>                          | FR-3 & FR-4       | 100                    | 67                              |
| 2  | Aires 2007           | ACORDA     | 8-16                      | 41                                 | MTI                | 60                           | ---                                       | 16.67                                | 4+2                                     | PUY               | PUY                    | 67                              |
| 3  | Aires 2010           |            | 11-18                     | 111                                | 7164               | 60                           | 10                                        | 10                                   | 4+1                                     | EYHS              | EYHS                   | 100                             |
| 4  | Alhassan 2007        |            | 3-5                       | 32                                 | <i>Actigraph</i>   | 30                           | 20                                        | 10                                   | ---                                     | SIR               | SIR                    | 67                              |
| 5  | Alhassan 2008        | GEMS       | 8-10                      | 208                                | 7164               | 60                           | 20                                        | ---                                  | <i>unclear</i>                          | PUY               | 100                    | 67                              |
| 6  | Alwis 2007           | POP        | 7-9                       | 230                                | 7164               | 10                           | 10                                        | 8                                    | 4                                       | FR-3              |                        | 100                             |
| 7  | Alwis 2008           | POP        | 7-9                       | 137                                | 7164               | 10                           | 10                                        | 8                                    | 4                                       | FR-3              |                        | 100                             |
| 8  | Anderson 2005        |            | grade 8                   | 80                                 | 7164               | 60                           | 20                                        | 10                                   | 4                                       | FR-3 & PUY        |                        | 100                             |
| 9  | Andersen 2006        | EYHS       | 9,15                      | 1732                               | 7164               | 60                           | 10                                        | 10                                   | 3                                       | EYHS              |                        | 100                             |
| 10 | Andersen 2007        |            | 13-15                     | 81                                 | 7164               | 60                           | 20                                        | 10                                   | 4                                       | FR-3              |                        | 100                             |
| 11 | Aznar 2006           |            | 4-7                       | 14                                 | MTI                | 60                           | ---                                       | 10                                   | 7                                       | FR-A              | 100                    | 67                              |
| 12 | Baggett 2008         | TAAG       | grade 6&8                 | 951                                | 7164               | 30                           | ---                                       | ---                                  | 6                                       | TR-4.6            | 100                    | 67                              |
| 13 | Baggett 2010         | TAAG       | grade 8                   | 6916                               | 7164               | 30                           | 20 <sup>b</sup>                           | 70/80 <sup>b</sup>                   | 6 <sup>bc</sup>                         | TR-4.6            | 100                    | 100                             |
| 14 | Bagley 2006          | CLAN       | 5-6,10-12                 | 1180                               | 7164               | 60                           | ---                                       | 10                                   | 4                                       | FR-3              |                        | 83                              |
| 15 | Baker 2007           |            | 11,13                     | 143                                | 7164               | 30                           | 20                                        | 10                                   | 4                                       | FR-Y              |                        | 100                             |
| 16 | Ball 2009            | CLAN       | 5-6,10-12                 | 900                                | 7164               | 60                           | ---                                       | 10                                   | 4                                       | FR-3              | FR-1.9                 | 67                              |
| 17 | Baquet 2007          |            | 8-10                      | 26                                 | 7164               | 2                            | 10                                        | ---                                  | 7                                       | FR-A              |                        | 83                              |
| 18 | Basterfield 2008     | GMS        | 6-7                       | 130                                | 7164               | ---                          | <i>unclear</i>                            | ---                                  | 7                                       | PUY               |                        | 50                              |
| 19 | Bender 2005          | PARADE     | 5-12                      | 65                                 | 7164               | 60                           | ---                                       | ---                                  | 4                                       | ---               |                        | 50                              |
| 20 | Brito 2009           | EYHS-D/E   | 9,15                      | 2101                               | 7164               |                              | ---                                       | ---                                  | ---                                     | counts            |                        | 25                              |
| 21 | Brockman 2010        |            | 10-11                     | 747                                | GT1M               | 10                           | ---                                       | 8.33                                 | 3                                       | PUY <sup>d</sup>  |                        | 83                              |
| 22 | Byrd-Williams 2007   | IMPACT     | grade 4                   | 169                                | <i>Actigraph</i>   | 60                           | 20                                        | 6                                    | 2                                       | PUY               | PUY                    | 83                              |
| 23 | Cardon 2007          |            | 4-5                       | 76                                 | 7164               | 15                           | ---                                       | 8.6                                  | 2+2                                     | SIR               | SIR                    | 83                              |
| 24 | Cardon 2008          |            | 4-5                       | 76                                 | 7164               | 15                           | ---                                       | 8.6                                  | 2+2                                     | SIR               | SIR                    | 83                              |
| 25 | Carver 2008          | CLAN       | 8-9,13-15                 | 534                                | 7164               | 60                           | ---                                       | 10/20                                | ---                                     | FR-3              |                        | 67                              |
| 26 | Carver 2008          | CLAN       | 8-9,13-15                 | 534                                | 7164               | 60                           | ---                                       | 10/20                                | ---                                     | FR-3              |                        | 67                              |
| 27 | Carver 2010          | CLAN       | 8-9,13-15                 | 446                                | 7164               | 60                           | ---                                       | 10/20                                | 4+1                                     | FR-3              |                        | 67                              |
| 28 | Casazza 2009         |            | 7-12                      | 202                                | GT1M               | 60                           | ---                                       | ---                                  | ---                                     | <i>unclear</i>    | ---                    | 33                              |
| 29 | Casazza 2009         |            | 7-12                      | 215                                | GT1M               | 60                           | ---                                       | ---                                  | ---                                     | --- (3 MET)       | ---                    | 33                              |
| 30 | Catellier 2005       | TAAG       | grade 8                   | 181                                | 7164               | 30                           | 20                                        | ---                                  | 7                                       | TR-4.6            | 100                    | 83                              |
| 31 | Cleland 2008         | CLAN       | 5-6,10-12                 | 908                                | 7164               | 60                           | ---                                       | 10/20                                | 3+1                                     | FR-3              |                        | 67                              |
| 32 | Cliff 2009           | PANDA      | 3-5                       | 46                                 | 7164               | 60                           | 20                                        | 6                                    | 3                                       | SIR               | REI                    | 100                             |
| 33 | Cohen 2006           | TAAG       | grade 6                   | 1556                               | 7164               | 30                           | ---                                       | ---                                  | 6 <sup>bc</sup>                         | TR-3 & TR-4.6     |                        | 67                              |

|    |                   |          |                |         |                  |    |                 |                    |                 |        |      |     |
|----|-------------------|----------|----------------|---------|------------------|----|-----------------|--------------------|-----------------|--------|------|-----|
| 34 | Cooper 2005       | EYHS     | 9              | 323     | 7164             | 60 | ---             | 10                 | 2+2             | TRS    |      | 67  |
| 35 | Cooper 2006       | EYHS     | 9,15           | 531     | 7164             | 60 | 10              | 10                 | 3               | TR-4.6 |      | 100 |
| 36 | Cooper 2010       | PEACH    | 11.3 (0.3)     | 137     | GT1M             | 10 | 10              | 8                  | 2               | PUY    |      | 100 |
| 37 | Cooper 2010       | PEACH    | 11.0 (0.4)     | 1010    | GT1M             | 10 | 60              | <1day              | 1               | counts |      | 100 |
| 38 | Corder 2010       | SPEEDY   | 9-10           | 1868    | GT1M             | 5  | 10              | 8.3                | 3               | EYHS   |      | 100 |
| 39 | Davison 2009      |          | 13, 15         | 236     | 7164             | 30 | 20              | 10                 | 4               | FR-Y   |      | 100 |
| 40 | Davison 2010      |          | 13, 15         | 236     | 7164             | 30 | 20              | 10                 | 4               | FR-Y   |      | 100 |
| 41 | Davison 2010      |          | 13, 15         | 236     | 7164             | 30 | 20              | 10                 | 4               | FR-Y   |      | 100 |
| 42 | De Vries 2009     | SPACES   | 6-11           | 51      | 7164             | 60 | 10              | 8.33               | 4               | FR-3   |      | 100 |
| 43 | Deforche 2009     |          | 6-10           | 97      | 7164             | 60 | 60              | 10                 | 2+1             | EYHS   | EYHS | 100 |
| 44 | Dencker 2006      | Bunkeflo | 7-11           | 229     | 7164             | 10 | 10              | 8                  | 3               | FR-3   |      | 100 |
| 45 | Dencker 2006      | Bunkeflo | 8-11           | 227     | 7164             | 10 | 10 <sup>b</sup> | 8                  | 3               | FR-3   |      | 100 |
| 46 | Dencker 2006      | Bunkeflo | 8-11           | 228     | 7164             | 10 | 10 <sup>b</sup> | 8                  | 3               | FR-3   |      | 100 |
| 47 | Dencker 2007      | Bunkeflo | 7-11           | 229     | 7164             | 10 | 10 <sup>b</sup> | 8                  | 3               | FR-3   |      | 100 |
| 48 | Dencker 2008      | Bunkeflo | 7-11           | 225     | 7164             | 10 | 10 <sup>b</sup> | 8                  | 3               | FR-3   |      | 100 |
| 49 | Dencker 2008      | Bunkeflo | 8-11           | 158     | 7164             | 10 | 10 <sup>b</sup> | 8                  | 3               | FR-3   |      | 100 |
| 50 | Dencker 2009      | Bunkeflo | 8-11           | 228     | 7164             | 10 | 10 <sup>b</sup> | 8                  | 3               | FR-3   |      | 100 |
| 51 | Dencker 2010      | CoSCIS   | 5-8            | 468     | 7164             | 10 | 10              | 8                  | 3               | MAT    | MAT  | 100 |
| 52 | Dishman 2010      | TAAG     | grade 6&8      | 1759    | 7164             | 30 | 20 <sup>b</sup> | 70/80 <sup>b</sup> | 6 <sup>bc</sup> | TR-4.6 | 100  | 100 |
| 53 | Dowda 2007        | TAAG     | grade 6        | 1525    | 7164             | 30 | ---             | ---                | 6 <sup>c</sup>  | TR-4.6 | 100  | 67  |
| 54 | Dowda 2009        | CHAMPS   | 3-5            | 299     | 7164             | 15 | 60              | 5                  | ---             | PTE    | PTE  | 83  |
| 55 | Dzewaltowski 2010 | HOP'N    | 9              | 273&246 | GT1M             | 30 | ---             | ---                | ---             | FR-4   | 100  | 50  |
| 56 | Eiberg 2005       | CoSCIS   | 6-7            | 592     | 7164             | 10 | 10              | 8                  | 3               | EYHS   |      | 100 |
| 57 | Eijkemans 2008    | KOALA    | 4-5            | 305     | <i>Actigraph</i> | 15 | ---             | 6.7                | 3+1             | SIR    | SIR  | 67  |
| 58 | Eisenman 2010     |          | 7.3 (2.0)      | 144     | 7164             | 60 | ---             | 8                  | 3+1             | WLK1   |      | 83  |
| 59 | Ekelund 2006      | SWEDES   | 17             | 49      | 6471             | 60 | ---             | 10                 | 5               | EYHS   | EYHS | 67  |
| 60 | Ekelund 2006      | EYHS     | 9-10,15-16     | 1921    | 7164             | 60 | ---             | 10                 | 3               | counts |      | 80  |
| 61 | Ekelund 2007      |          | 17.5&21.7(1.7) | 28      | <i>Actigraph</i> | 60 | ---             | 10                 | 10 & 6          | FR-A   | 100  | 67  |
| 62 | Epstein 2005      |          | 12-16          | 15      | 7164             | 60 | ---             | ---                | 3               | ---    |      | 33  |
| 63 | Epstein 2005      |          | 8-16           | 58      | 7164             | 60 | ---             | ---                | 3               | 3 METs |      | 50  |
| 64 | Esliger 2010      |          | 8-13           | 413     | 7164             | 60 | ---             | 10                 | 4+1             | FR-4   | MAT  | 83  |
| 65 | Evenson 2007      | TAAG     | grade 6        | 1554    | 7164             | 30 | 20              | 70/80              | 6 <sup>c</sup>  | TR-4.6 | 100  | 100 |
| 66 | Evenson 2010      | TAAG     | grade 6&8      | 847     | 7164             | 30 | 20              | 70/80              | 1               | TR-4.6 | 100  | 100 |
| 67 | Fairclough 2007   |          | 7-11           | 58      | GT1M             | 5  | 20              | 70/80              | 4               | FR-A   |      | 100 |
| 68 | Fairclough 2010   |          | 10-11          | 175     | GT1M             | 5  | 20              | 70/80              | 2+1             | EYHS   | EYHS | 100 |
| 69 | Fisher 2005       | MAGIC    | 4.2 (0.5)      | 394     | 7164             | 60 | ---             | 9                  | 3               | PUY    | REI  | 67  |
| 70 | Gaya 2009         |          | 11-17          | 163     | GT1M             | 60 | ---             | 8                  | 4               | EYHS   | EYHS | 83  |

|     |                     |              |             |      |                  |     |                 |          |       |              |        |     |
|-----|---------------------|--------------|-------------|------|------------------|-----|-----------------|----------|-------|--------------|--------|-----|
| 71  | Gidlow 2008         | CHAMPS       | 3-16        | 503  | GT1M             | 60  | ---             | 10/8     | ---   | FR-3 & PUY   | 67     |     |
| 72  | Goran 2005          |              | 8-11        | 122  | 7164             | 60  | 20              | 6        | 3     | FR-A         | 100    |     |
| 73  | Griew 2010          | PEACH        | 10-11       | 1162 | GT1M             | 10  | 10              |          | 2     | counts       | 100    |     |
| 74  | Guinhouya 2007      |              | 8-11        | 103  | 7164             | 60  | ---             | 10       | ---   | PUY          | REI    | 67  |
| 75  | Guinhouya 2009      |              | 8-11        | 93   | 7164             | 60  | 20              | 11.2     | 2     | PUY          | PUY    | 83  |
| 76  | Gutin 2005          |              | 14-18       | 304  | 7164             | 60  | ---             | ---      | 5     | --- (3 METs) |        | 50  |
| 77  | Gutin 2005          |              | 16.2 (1.2)  | 421  | 7164             | 60  | ---             | ---      | 5     | --- (3 METs) |        | 50  |
| 78  | Gwynn 2010          |              | 10-12       | 86   | 7164             | 60  | 20              | 70/40%   | 3     | FR-3         |        | 100 |
| 79  | Haerens 2006        |              | grade 7-8   | 236  | 7164             | 60  | ---             | ---      | ---   | PUY          | PUY    | 50  |
| 80  | Haerens 2007        |              | 11-13       | 185  | 7164             | 60  | ---             | ---      | ---   | FR-A         |        | 50  |
| 81  | Haerens 2007        |              | 11-15       | 183  | 7164             | 60  | ---             | 16       | ---   | PUY          | PUY    | 50  |
| 82  | Hager 2006          |              | 9-12        | 80   | 7164             | 60  | ---             | ---      | ---   | counts       |        | 40  |
| 83  | Hagler 2006         |              | 10-16       | 878  | MTI              | 60  | ---             | ---      | ---   | TRS          | 100    | 17  |
| 84  | Hagströmer 2008     | HELENA       | 12-17       | 436  | GT1M             | 15  | 10              | 10       | 3+1   | TRS          |        | 100 |
| 85  | Hannon 2008         |              | 3-5         | 64   | GT1M             | 15  | ---             | ---      | 5 & 5 | SIR          | SIR    | 67  |
| 86  | Hansen 2005         | CoSCIS       | 6-7         | 572  | 7164             | 10  | 10              | 8        | 3     | counts       |        | 100 |
| 87  | Hasselstrøm 2007    | CoSCIS       | 6-8         | 562  | 7164             | 10  | 10              | 8        | 3     | vigorous     |        | 100 |
| 88  | Hasselstrøm 2008    | CoSCIS       | 6-8         | 379  | 7164             | 10  | 10              | 8        | 3     | counts       |        | 100 |
| 89  | Heath 2010          |              | 6-18        | 19   | GT1M             | 60  | ---             | ---      | ---   | ---          |        | 16  |
| 90  | Heelan 2009         | WSB          | grade K-5   | 282  | 7164             | 15  | 20 <sup>b</sup> | 3/20     | 2     | WLK2         |        | 100 |
| 91  | Heilman 2009        |              | 4-18        | 60   | <i>actigraph</i> |     | ---             | ---      | ---   | counts       |        | 25  |
| 92  | Hennessy 2010       | SvChdrn      | 9.1 (1.5)   | 76   | 7164             | 30  | 60 <sup>g</sup> | 70/80    | 4+1   | FR-Y         |        | 100 |
| 93  | Hesketh 2006        | CLN/HPSA     | 6,11        | 2458 | 7164             | 60  | ---             | 10/20    | 4     | FR-3         | FR-1.9 | 83  |
| 94  | Holmes 2008         |              | 8-18        | 37   | MTI              | 60  | ---             | ---      | ---   | FR-3         |        | 33  |
| 95  | Hopkins 2009        | SprtsLinx    | 9-10        | 122  | GT1M             | 5   | 20              | 9        | 3     | IND          |        | 100 |
| 96  | Houwen 2009         |              | 6-12        | 96   | GT1M             | 60  | other           | 10       | 3+1   | PUY          | PUY    | 100 |
| 97  | Hughes 2006         | SCOTT        | 5-11        | 116  | 7164             | 60  | ---             | 6        | 3     | PUY          | REI    | 83  |
| 98  | Hume 2005           |              | 10          | 127  | 7164             | 60  | ---             | <10,000  | 3     | FR-3         | FR-1.5 | 83  |
| 99  | Hume 2007           |              | 10          | 280  | 7164             | 60  | ---             | 10/20    | 3     | counts       |        | 80  |
| 100 | Hume 2008           | Sw-Play      | 9-12        | 248  | 7164             | 60  | ---             | 10/10/20 | 2+1   | FR-3         |        | 83  |
| 101 | Hurtig-Wennlöf 2007 | EYHS-S/E     | 9-10,15-16  | 1125 | 7164             | 60. | ---             | 10       | 2+1   | FR-3         | 100    | 67  |
| 102 | Jago 2005           |              | grade 8     | 81   | MTI              | 60  | 20              | 70%      | 4     | PUY          | PUY    | 83  |
| 103 | Jago 2005           |              | 10-14       | 210  | MTI              | 60  | 20              | 13.3     | 2     | PUY          | PUY    | 83  |
| 104 | Jago 2006           |              | 10-14       | 210  | MTI              | 60  | ---             | 13.3     | 2     | PUY          | PUY    | 67  |
| 105 | Jago 2006           | Fit for Life | 10-14       | 473  | MTI              | 60  | 20              | 13.3     | 1     | PUY          | PUY    | 83  |
| 106 | Jago 2007           |              | 10-14       | 447  | MTI              | 60  | 20              | 13.3     | 2     | PUY          | PUY    | 83  |
| 107 | Jago 2008           | EYHS-D       | grade 3 & 9 | 384  | 7164             | 60  | 10              | 10       | 3     | TR-4.6       | 100    | 100 |

|     |                     |             |            |         |               |                   |                 |                    |                  |                  |                  |     |
|-----|---------------------|-------------|------------|---------|---------------|-------------------|-----------------|--------------------|------------------|------------------|------------------|-----|
| 108 | Jago 2010           | ALSPAC      | 11         | 5134    | 7164          | 60                | 10 <sup>b</sup> | 10                 | 3                | MAT              |                  | 83  |
| 109 | Jago 2010           | BR3Ps       | 10-11      | 761     | GT1M          | 10                | 60              | 8.33               | 3                | PUY <sup>d</sup> | PUY <sup>d</sup> | 100 |
| 110 | Janz 2005           | IBD         | 5 & 8      | 378     | 7164          | 60                | ---             | 8                  | 3                | FR-3             | FR-1.4           | 83  |
| 111 | Janz 2006           | IBD         | 5 & 8      | 370     | 7164          | 60                | ---             | 8                  | 3                | TR-4.6           |                  | 83  |
| 112 | Janz 2007           | IBD         | 5 & 8 & 11 | 468     | 7164          | 60                | ---             | 8                  | 3                | TR-4.6           |                  | 83  |
| 113 | Janz 2008           | IBD         | 11         | 449     | 7164          | 60                | ---             | 8                  | 3                | WLK1             |                  | 83  |
| 114 | Janz 2008           | Iowa Flride | 13         | 49      | 7164          | 60                | ---             | 8                  | 3                | FR-3             |                  | 83  |
| 115 | Janz 2009           | IBD         | 5 & 8 & 11 | 333     | 7164          | 60                | ---             | 8                  | 3                | TR-4.6           |                  | 83  |
| 116 | Janz 2010           | IBD         | 5 & 8 & 11 | 333     | 7164          | 60                | ---             | 8                  | 3                | TR-4.6           | 100              | 83  |
| 117 | Johnson 2008        | TAAG        | grade 6    | 1397    | MTI           | 30                | 20 <sup>b</sup> | 70/80 <sup>b</sup> | 6 <sup>bc</sup>  | TR-4.6           | 100              | 83  |
| 118 | Kelly 2005          |             | 4-5        | 41      | 7164          | 60                | ---             | 6                  | 7                | PUY              | REI              | 83  |
| 119 | Kelly 2006          | MAGIC       | 4, 5-6     | 339,78  | accelerometer | 60                | ---             | 6                  | 6,7              | PUY              | REI              | 83  |
| 120 | Kelly 2007          | SPARKLE     | 3-6        | 42      | Actigraph     | 60                | other           | 6                  | 3 & 5            | PUY              | REI              | 83  |
| 121 | Kelly 2010          | TAAG        | grade 6    | 1180    | MTI           | 30                | 20 <sup>b</sup> | 70/80 <sup>b</sup> | 6 <sup>bc</sup>  | TR-4.6           | 100              | 83  |
| 122 | Kligerman 2007      |             | 14-17      | 98      | Actigraph     | 60                | ---             | ---                | 4                | TRS              |                  | 33  |
| 123 | Kolle 2009          |             | 9&15       | 1824    | 7164          | 10                | 10              | 8                  | 2                | EYHS             |                  | 100 |
| 124 | Kriemler 2008       | KISS        | 6-13       | 269     | 7164          | 60                | 15              | 12/10              | 3+1              | TR-4.6           |                  | 100 |
| 125 | Kriemler 2010       | KISS        | grade 1,5  | 502     | 7164          | 60                | 15              | 12                 | 2                | EYHS             |                  | 100 |
| 126 | Krishnaveni 2009    |             | 6-7        | 103     | 7164          | 60                | ---             | 8.33               | 2                | KRI              | KRI              | 83  |
| 127 | Kristensen 2008     | EYHS-D      | 8-10&14-16 | 1330    | MTI           |                   | 10              | 10                 | 3                | counts           |                  | 75  |
| 128 | Kristensen 2008     | EYHS-D      | 8-10&14-16 | 208     | MTI           |                   | 10              | 10                 | 3                | counts           |                  | 75  |
| 129 | Lanctot 2008        | GEMS        | 8-10       | 284     | 7164          | 60                | ---             | ---                | ---              | TR-4.6           | 100              | 50  |
| 130 | Leary 2008          | ALSPAC      | 11-12      | 5505    | 7164          | 60                | 10 <sup>b</sup> | 10                 | 3                | MAT              |                  | 83  |
| 131 | Lohman 2006         | TAAG        | grade 6    | 1553    | 7164          | 30                | 20 <sup>b</sup> | ---                | 6 <sup>bc</sup>  | TR-4.6           | 100              | 83  |
| 132 | Lohman 2008         | TAAG        | grade 8    | 1019    | 7164          | 30                | 20 <sup>b</sup> | ---                | 6 <sup>bc</sup>  | TR-4.6           | 100              | 83  |
| 133 | Lopes 2007          |             | 6-18       | 503     | 7164          | 60                | 10              | ---                | ---              | FR-3             |                  | 67  |
| 134 | Loprinzi 2010       |             | 2-5        | 156     | 7164          | 15                | 10              | <1day              | 2                | SIR              | SIR              | 100 |
| 135 | Maddison 2010       |             | 12-17      | 79      | 7164          | 60                | 20              | 10                 | 2+1              | FR-3             |                  | 83  |
| 136 | Maggio 2010         |             | 4-17       | 85      | 6471          | 60                | 20              | 10                 | 3+1              | EYHS             | EYHS             | 83  |
| 137 | Magnússon 2008      |             | 9          | 177     | 7164          | 60                | ---             | 10                 | 2+1              | counts           |                  | 80  |
| 138 | Maloney 2008        | DANCER      | 7-8        | 59 & 51 | MTI           | ---               | 20 <sup>b</sup> | 80% <sup>c</sup>   | 6 <sup>c</sup>   | TR-3             | 100              | 67  |
| 139 | Mark 2008           | NHANES      | 8-17       | 1170    | 7124          | 60                | 20              | 10                 | 3+1              | TR-4.6           | 100              | 100 |
| 140 | Mark 2009           | NHANES      | 8-17       | 2498    | 7124          | 60                | 20              | 10                 | 3+1              | TR-4.6           | 100              | 100 |
| 141 | Martínez-Gómez 2009 | AFINOS      | 13-17      | 202     | GT1M          | 15 <sup>(r)</sup> | 10 <sup>b</sup> | 10 <sup>b</sup>    | 3+1 <sup>b</sup> | FR-Y             |                  | 100 |
| 142 | Martínez-Gómez 2009 | AFINOS      | 13-16      | 214     | GT1M          | 15                | 10              | 10                 | 3+1              | FR-Y             | 100              | 100 |
| 143 | Martínez-Gómez 2009 |             | 3-8        | 111     | 7164          | 30                | 20              | 3/20               | 2+1              |                  | 100              | 100 |
| 144 | Martínez-Gómez 2010 | AFINOS      | 13-17      | 201     | GT1M          | 15                | 10              | 10                 | 3+1              |                  | 100              | 100 |

|     |                          |           |            |           |            |                 |                 |                  |                 |                   |      |     |
|-----|--------------------------|-----------|------------|-----------|------------|-----------------|-----------------|------------------|-----------------|-------------------|------|-----|
| 145 | Martínez-Gómez 2010      | HELENA    | 12-17      | 2094      | GT1M       | 15              | 20              | 8                | 3               | EYHS              |      | 100 |
| 146 | Martínez-Gómez 2010      |           | 12-16      | 37        | GT1M       | 60              | 10              | 10               | 3               | EYHS              | EYHS | 100 |
| 147 | Mattocks 2007            | ALSPAC    | 11-12      | 244       | 7164       | 60              | 10              | 10               | 3               | MAT               | MAT  | 100 |
| 148 | Mattocks 2008            | ALSPAC    | 11-12      | 5451      | 7164       | 60              | 10              | 10/150/3sd       | 3               | MAT               | MAT  | 100 |
| 149 | Mattocks 2008            | ALSPAC    | 11         | 6086      | 7164       | 60              | 10              | 10/150/3sd       | 3               | MAT               | MAT  | 100 |
| 150 | Mattocks 2010            | ALSPAC    | 12         | 4735      | 7164       | 60 <sup>b</sup> | 10 <sup>b</sup> | 10 <sup>b</sup>  | 3 <sup>b</sup>  | MAT               |      | 100 |
| 151 | McCrinkle 2007           | Fontan    | 7-18       | 108       | Actigraph  | 60              | ---             | ---              | 2+1             | FR-3              |      | 50  |
| 152 | McGall 2009              |           | grade 3-4  | 60        | GT1M       | 60              | ---             | ---              | 4               | TR-4.6            | 100  | 67  |
| 153 | McLure 2009              |           | 9-10       | 246       | GT256      | 60              | manual          | 3                | 2               | FR-3 & PUY        |      | 83  |
| 154 | McLure 2009              |           | 9-10       | 157       | GT256      | 60              | manual          | 3                | 2               | FR-3              |      | 83  |
| 155 | McMurray 2008            | TAAG      | 11-14      | 691       | Actigraph  | 30              | 20 <sup>b</sup> | 80% <sup>c</sup> | 1               | unclear           |      | 67  |
| 156 | Metallinos-Katsaras 2007 |           | 2-5        | 56        | 7164       | 60              | ---             | ---              | ---             | FR-3              |      | 50  |
| 157 | Metcalf 2008             | EarlyBird | 5,6,7 & 8  | 212       | Actigraph  | 60              | ---             | 9                | 20 <sup>e</sup> | MTC               |      | 67  |
| 158 | Metcalf 2009             | EarlyBird | 5,6,7 & 8  | 307       | Actigraph  | 60              | 17              | 9                | 5               | MTC               |      | 83  |
| 159 | Mhurchu 2008             |           | 12 (1.5)   | 20        | 7164       | 60              | 20              | 8                | 2+1             | FR-3              |      | 83  |
| 160 | Mitchell 2009            | ALSPAC    | 11-12      | 5434      | 7164       | 60              | ---             | 10               | 3               | MAT               | MAT  | 83  |
| 161 | Mitchell 2010            |           | 8-18       | 39        | GT1M       | 15              | 30              | 10/60%           | 3               | FR-3              |      | 100 |
| 162 | Møller 2009              | EYHS-D    | 8-10       | 381 & 416 | 7164 & MTI | 60              | 10              | 10               | 3               | FR-3 <sup>f</sup> |      | 100 |
| 163 | Moreir 2008              |           | 9-16       | 34        | 7164       | 60              | ---             | ---              | ---             | PUY               | PUY  | 50  |
| 164 | Morgan 2008              | HIKCUPS   | 5-9        | 137       | 7164       | 60              | 20              | 10               | 4               | FR-3              |      | 100 |
| 165 | Mota 2005                |           | 8-10       | 22        | 7164       | 60              | ---             | ---              | 3               | FR-3              |      | 67  |
| 166 | Mota 2007                | CV risk   | 8-15       | 62        | 7164       | 60              | 20              | 12               | 3               | FR-3 & PUY        |      | 100 |
| 167 | Mota 2008                | CV risk   | 10-15      | 54        | MTI        | 60              | ---             | 80%              | 3               | FR-3              |      | 83  |
| 168 | Murray 2006              | TAAG      | grade 6    | 1603      | Actigraph  | 30              | 20              | 80%              | 1               | TR-4.6            | 100  | 83  |
| 169 | Nader 2008               | NICHD     | 9,11,12&15 | 1032      | CSA        | 60              | vis inspect     | vis inspect      | 4               | FR-3              |      | 67  |
| 170 | Ness 2007                | ALSPAC    | 11-12      | 5595      | 7164       | 60              | ---             | 10               | 3               | MAT               |      | 83  |
| 171 | Niedere 2009             |           | 4-6        | 655       | 7164       | 15              | ---             | ---              | ---             | PTE               | PTE  | 50  |
| 172 | Nilsson 2009             | EYHS      | 9,15       | 1954      | 7164       | 60              | 10              | 10               | 2+1             | EYHS              | 100  | 100 |
| 173 | Nilsson 2009             | EYHS      | 9,15       | 1327      | 7164       | 60              | 10              | 10               | 2+1             | EYHS              | 100  | 100 |
| 174 | Noel 2010                | ALSPAC    | 13-14      | 2868      | Actigraph  | 60              | ---             | ---              | 3               | MAT               |      | 50  |
| 175 | Ortega 2007              | EYHS-S    | 9,15       | 1074      | 7164       | 60              | ---             | 10               | 2+1             | FR-3              |      | 83  |
| 176 | Ortega 2008              | EYHS-S    | 14-16      | 472       | 7164       | 60              | ---             | 10               | 3               | FR-3              |      | 83  |
| 177 | Owen 2009                | CHASE     | 9-10       | 2071      | GT1M       | 5               | 20              | 10               | 1               | EYHS              | 100  | 100 |
| 178 | Paez 2009                | DANCER    | 7-8        | 60        | CSA        | 60              | 20 <sup>b</sup> | 80% <sup>c</sup> | 4+1             | TR-3              |      | 100 |
| 179 | Page 2005                |           | 9-11       | 133       | 7164       | 60              | ---             | 10/8             | 3+1             | TRS               |      | 83  |
| 180 | Page 2009                | PEACH     | 10-11      | 863       | GT1M       | 10              | 10              | 8                | ---             | counts            |      | 80  |
| 181 | Pan 2006                 |           | 10-19      | 30        | MTI 7164   | 60              | ---             | 8                | 3+1             | FR-3              |      | 83  |

|     |                   |           |            |          |           |     |                 |                    |                 |                    |      |     |
|-----|-------------------|-----------|------------|----------|-----------|-----|-----------------|--------------------|-----------------|--------------------|------|-----|
| 182 | Pan 2008          |           | 7-12       | 48       | GT1M      | 60  |                 | <1day              |                 | FR-3               |      | 100 |
| 183 | Pan 2008          |           | 7-12       | 48       | GT1M      | 60  |                 | <1day              |                 | FR-3               |      | 100 |
| 184 | Pate 2006         | TAAG      | grade 6    | 1578     | 7164      | 30  | 20 <sup>b</sup> | 80% <sup>b</sup>   | 6 <sup>c</sup>  | TR-3,TR-3.8,TR-4.6 | 100  | 100 |
| 185 | Pate 2009         | TAAG      | grade 6&8  | 2041     | 7164      | 30  | 20 <sup>b</sup> | 80% <sup>b</sup>   | 6 <sup>bc</sup> | TR-4.6             | 100  | 100 |
| 186 | Patnode 2010      | IDEA      | 15.4 (1.7) | 294      | 7164      | 60  | 30              | 8                  | 4               | FR-4               |      | 83  |
| 187 | Patrick 2006      | PACE+     | 11-15      | 330      | 7164      | 60  | ---             | 10                 | 3               | 3 METs             |      | 67  |
| 188 | Pearson 2009      |           | 12-16      | 176      | GT1M      | 5   | ---             | 10/20              | 3               | FR-3               |      | 83  |
| 189 | Pfeiffer 2009     | CHAMPS    | 3-5        | 331      | 7164      | 15  | 60              | 5                  | 3               | PTE                | PUY  | 100 |
| 190 | Philippaerts 2006 |           | 12-18      | 33       | 7164      | 60  | ---             | ---                | 7               | FR-EE              |      | 67  |
| 191 | Prista 2009       | HBV       | 6-16, 6-18 | 256, 494 | 7164      | 60  | 10              | ---                | 1               | FR-3               |      | 83  |
| 192 | Purslow 2008      | PEACHES   | 8-9        | 301      | GT1M      | 60  | 10              | 10                 | 2+1             | EYHS               | 100  | 100 |
| 193 | Purslow 2009      |           | 11         | 234      | 7164      | 60  | 10              | 10                 | 2+1             | counts             |      | 100 |
| 194 | Quigg 2010        | CALE      | 5-10       | 184      | GT1M      | 60  | ---             | 5                  | GPS-matched     | counts             |      | 60  |
| 195 | Reilly 2006       |           | 4          | 285      | 7164      | 60  | ---             | ---                | 6               | PUY                | REI  | 67  |
| 196 | Riddoch 2007      | ALSPAC    | 11         | 5595     | 7164      | 60  | ---             | 10                 | 3               | MAT                | EYHS | 83  |
| 197 | Riddoch 2009      | ALSPAC    | 12&14      | 4614     | 7164      | 60  | 10              | 10                 | 3               | MAT                | MAT  | 100 |
| 198 | Ridgers 2009      |           | 9-12       | 98       | 7164      | 5   | 20              | 9                  | 3               | FR-Y               | 100  | 100 |
| 199 | Ries 2009         | BALTS     | grade 9-12 | 316      | ActiGraph | 30  | ---             | ---                | ---             | TR-3               | 100  | 33  |
| 200 | Rizzo 2007        | EYHS-S    | 9, 15      | 529      | 7164      | 60  | ---             | 10                 | 3               | FR-3               |      | 83  |
| 201 | Rizzo 2008        | EYHS-S/E  | 15-16      | 613      | 7164      | 60  | ---             | 10                 | 3               | FR-3               | 100  | 83  |
| 202 | Rodrigues 2010    |           | 13-16      | 302      | GT1M      | 60  | ---             | 10                 | 5               | FR-4               | PUY  | 83  |
| 203 | Roemmich 2006     |           | 4-7        | 59       | CSA       | 60  | ---             | ---                | ---             | counts             |      | 40  |
| 204 | Ross 2009         |           | 4-18       | 116      | CSA       | 60  | ---             | ---                | ---             | ---                |      | 33  |
| 205 | Rowlands 2008     |           | 9-11       | 84       | GT1M      | 2   | 60              | 10/8               | 3+1             | TRS                | ROW  | 100 |
| 206 | Rowlands 2009     |           | 9-11       | 64       | GT1M      | 2   | 60              | 10/ 8              | 3+1             | TRS                | ROW  | 100 |
| 207 | Ruiz 2006         | EYHS-S/E  | 9-10       | 780      | 7164      | 60  | ---             | 10                 | 3               | FR-3               |      | 67  |
| 208 | Ruiz 2007         | EYHS-S    | 9-10       | 144      | 7164      | 60  | ---             | 10                 | 3               | FR-3               |      | 67  |
| 209 | Ruiz 2007         | EYHS-S    | 9-10       | 301      | 7164      | 60  | ---             | 10                 | 3               | FR-3               |      | 67  |
| 210 | Rushovich 2006    | TAAG      | grade 6    | 1422     | Actigraph | 30  | ---             | <1day              | 1               | TR-4.6             |      | 67  |
| 211 | Saelens 2007      |           | 8          | 42       | 7164      | 60  | 30              | <1day              | 4+1             | PUY                | PUY  | 100 |
| 212 | Saksvig 2007      | TAAG      | grade 6    | 1596     | 7164      | 30  | 20 <sup>b</sup> | 70/80 <sup>b</sup> | 1 or 6          | TR-3 &TR-4.6       | 100  | 100 |
| 213 | Salmon 2005       |           | 10-12      | 881      | 7164      |     | ---             | 10/20              | 3+1             | counts             |      | 75  |
| 214 | Salmon 2006       | CLAN      | 5-6,10-12  | 1331     | 7164      | --- | ---             | 10/20              | 4               | FR-3               |      | 67  |
| 215 | Salmon 2010       | CL/CL/HPS | 5-6,10-12  | 1200     | 7164      | 60  | ---             | 10/20              | 3+1             | FR-Y               |      | 67  |
| 216 | Sanchez 2007      |           | 11-15      | 770      | 7164      | 60  | ---             | ---                | 3               | FR-A               |      | 67  |
| 217 | Sardinha 2008     | EYHS      | 9-10       | 293      | 6471      | 60  | ---             | 10                 | 3               | EYHS               | 100  | 83  |
| 218 | Sardinha 2008     | EYHS      | 9-10       | 308      | MTI       | 60  | 10              | 10                 | 3               | EYHS               | EYHS | 83  |

|     |                    |           |              |      |         |    |                 |       |                |                   |                   |     |
|-----|--------------------|-----------|--------------|------|---------|----|-----------------|-------|----------------|-------------------|-------------------|-----|
| 219 | Sarnblad 2005      |           | 12-19        | 75   | 6471    | 60 | 30              | 10    | 5              | FR-A              | 100               | 100 |
| 220 | Schneider 2009     |           | 14-16        | 124  | 7164    | 60 | 30              | 8     | 2+2            | FR-A              |                   | 100 |
| 221 | Scott 2007         | TAAG      | grade 6      | 1603 | 7164    | 30 | 20 <sup>b</sup> | 80%   | 6 <sup>c</sup> | TR-4.6            | 100               | 100 |
| 222 | Scott 2007         | TAAG      | grade 6      | 1367 | 7164    | 30 | 20 <sup>b</sup> | 80%   | 6 <sup>c</sup> | TR-4.6            | 100               | 100 |
| 223 | Sherar 2007        |           | 8-13         | 401  | 7164    | 60 | ---             | ---   | 7 <sup>c</sup> | FR-3              |                   | 67  |
| 224 | Shoup 2008         |           | 8-12         | 177  | 7164    | 60 | ---             | 8     | 4              | FR-4              |                   | 67  |
| 225 | Sirard 2005        |           | 9-10         | 214  | 7164    | 60 | 20              | 6     | 3+1            | FR-3              |                   | 100 |
| 226 | Sirard 2008        | COOL      | 16.7 (1.3)   | 65   | GT1M    | 30 | 30              | 10    | 4              | FR-3              | 100               | 100 |
| 227 | Sirard 2009        |           | grade 9-12   | 87   | 7164    | 60 | 20              | 10    | 4              | FR-3              |                   | 100 |
| 228 | Sirard 2010        | IDEA/ECHO | 14.5 (1.8)   | 575  | 7164    | 30 | 30              | 10    | 4              | FR-Y <sup>h</sup> | FR-Y <sup>h</sup> | 100 |
| 229 | Steele 2009        | SPEEDY    | 9-10         | 1862 | GT1M    | 5  | 10              | 8.33  | 3              | EYHS              | 100               | 100 |
| 230 | Steele 2010        | SPEEDY    | 9-10         | 1568 | GT1M    | 5  | 10              | 8.33  | 2+1            | EYHS              | 100               | 100 |
| 231 | Stevens 2007       | TAAG      | grade 6&8    | 5645 | 7164    | 30 | 20              | 80%   | 6 <sup>c</sup> | TR-4.6            | 100               | 100 |
| 232 | Stone 2009         |           | 8-10         | 47   | GT1M    | 2  | ---             | 10    | 3+1            | MAT               | ROW               | 83  |
| 233 | Stone 2009         |           | 8-10         | 47   | GT1M    | 2  | ---             | 10    | 3+1            | MAT               | ROW               | 83  |
| 234 | Taber 2009         | TAAG      | grade 6&8    | 3114 | MTI     | 30 | ---             | ---   | <i>matched</i> | TR-4.6            | 100               | 33  |
| 235 | Thompson 2005      | PACY      | grade 3,7,11 | 1653 | 7164    | 60 | ---             | ---   | 5              | FR-3              |                   | 67  |
| 236 | Thompson 2009      | PACY      | grade 3,7,11 | 1790 | 7164    | 60 | ---             | 4     | 4+1            | FR-3              | FR< 1             | 83  |
| 237 | Thompson 2009      | PACY      | grade 3,7,11 | 1653 | GT1M    | 60 | ---             | ---   | ---            | ---               |                   | 17  |
| 238 | Timperio 2008      | CLAN      | 8- 9,13-15   | 497  | 7164    | 60 | ---             | 10/20 | 4+1            | TRS               |                   | 83  |
| 239 | Tobias 2007        | ALSPAC    | 11           | 4457 | 7164    | 60 | ---             | 10    | 3              | MAT               |                   | 83  |
| 240 | Trayers 2006       |           | 8-12         | 52   | 7164    | 60 | ---             | 10    | 2+2, 5         | Unclear & PUY     |                   | 83  |
| 241 | Tremblay 2005      |           | 8-13         | 399  | 7164    | 60 | ---             | ---   | ---            | FR-3              |                   | 50  |
| 242 | Treuth 2007        | TAAG      | 11-12        | 1603 | 7165    | 30 | ---             | 6     | 1              | TR-4.6            | 100               | 83  |
| 243 | Treuth 2009        | TAAG      | grade 6&8    | 984  | 7164    | 30 | ---             | 6     | 1              | TR-4.6            | 100               | 83  |
| 244 | Trigona 2010       |           | 6-17         | 61   | 6471    | 60 | 20              | ---   | 3+1            | EYHS              | EYHS              | 83  |
| 245 | Troiano 2008       | NHANES    | 6-19         | 1778 | 7164    | 60 | 60 <sup>g</sup> | 10    | 1, 4           | FR-4              | 100               | 100 |
| 246 | Troped 2007        | YRBS      | 12-13        | 139  | 7164    | 60 | 20              | 10    | 4              | FR-3              |                   | 100 |
| 247 | Vale 2009          |           | 2-5          | 59   | 7164    | 5  | ---             | 6     | 4              | SIR               | SIR               | 83  |
| 248 | Vale 2010          | PRESTYL   | 3-6          | 245  | GTM1    | 5  | ---             | 10    | 3+1            | PTE               | REI               | 83  |
| 249 | Van Coevering 2005 | Prj EAST  | grade 6-8    | 128  | 7164    | 60 | 180             | 10    | ---            |                   |                   | 80  |
| 250 | Van Sluijs 2008    | SPEEDY    | 9-10         | 1868 | GT1M    | 5  | 10              | 8.33  | 3              | EYHS              |                   | 100 |
| 251 | Van Sluijs 2009    | ALSPAC    | 11           | 4688 | 7164    | 60 | 10              | 10    | 3              | MAT               |                   | 100 |
| 252 | Van Sluijs 2010    | EYHS      | 9-10,14-15   | 2107 | 7164    | 60 | 10              | 10    | 3              |                   | MAT               | 100 |
| 253 | Verstraete 2007    |           | 10-11        | 111  | 7164    | 60 | ---             | ---   | ---            | FR-3              |                   | 50  |
| 254 | Voorhees 2009      | TAAG      | 11-12        | 1554 | 7165    | 30 | 20              | 6     | 1              | TR-4.6            | 100               | 100 |
| 255 | Voss 2008          |           | 7- 8         | 214  | MTI     | 60 | ---             | ---   | 4+1            | MTC               |                   | 50  |
| 256 | Watson 2006        |           | 10-14        | 452  | CSA/MTI | 60 | 20              | 13.3  | ---            | PUY               | PUY               | 67  |

|     |                      |           |                 |      |                  |     |                  |                    |                |                      |                      |     |
|-----|----------------------|-----------|-----------------|------|------------------|-----|------------------|--------------------|----------------|----------------------|----------------------|-----|
| 257 | Webber 2008          | TAAG      | grade 6&8       | 8727 | 7164             | 30  | 20 <sup>b</sup>  | 70/80 <sup>b</sup> | 6 <sup>c</sup> | TR-4.6               | 100                  | 100 |
| 258 | Wedderkopp 2009      |           | 12-13           | 163  | <i>MTI</i>       | 60  | 10               | 10                 | 3              | TRS                  |                      | 67  |
| 259 | Weintraub 2008       | SPORT     | 8-11            | 21   | <i>Actigraph</i> | 60  | ---              | ---                | ---            | TR-4.6               |                      | 33  |
| 260 | Welk 2007            | YMCLS     | 9-13            | 120  | <i>Actigraph</i> | 60  | 20               | 3/20               | 4              | TRS                  |                      | 83  |
| 261 | Wen 2010             | GUA       | 3 -5            | 31   | GT1M             | 15  | 60               | 8                  | 4              | SIR                  | SIR                  | 100 |
| 262 | Wennlöf 2005         | EYHS      | 9-16            | 969  | 7164             | 60  | ---              | 10                 | ---            | counts               |                      | 60  |
| 263 | Wenthe 2009          | IBD       | 12-14           | 205  | 7164             | 60  | ---              | 8                  | 3              | FR-3                 |                      | 83  |
| 264 | Wheeler 2010         | PEACH     | 10-11           | 1053 | GT1M             | 10  | 60 <sup>g</sup>  | 8 <sup>b</sup>     | ---            | PUY                  | PUY                  | 83  |
| 265 | Whitt-Glover 2009    | NHANES    | 6-9             | 2531 | 7164             | 60  | 60 <sup>bg</sup> | 10 <sup>b</sup>    | 1              | FR-4                 | 100                  | 100 |
| 266 | Wickel 2009          | YMCLS     | 9-14            | 161  | <i>Actigraph</i> | --- | 20               | 3/20               | 3+1            | FR-3                 |                      | 67  |
| 267 | Wilkin 2006          | EarlyBird | 4-10            | 522  | <i>MTI</i>       | 60  | ---              | ---                | 4+1            | MTC                  | MTC                  | 50  |
| 268 | Williams 2008        | CHAMPS    | 3-4             | 198  | 7164             | 15  | 60               | >4 & <18           | 3              | PTE                  | PTE                  | 100 |
| 269 | Wilson 2005          |           | 10-12           | 48   | <i>MTI</i>       | 60  | ---              | ---                | ---            | --- (3 METs)         |                      | 17  |
| 270 | Wong 2006            | SHAPES    | grade 6-8,10,12 | 53   | 7164             | 60  | 10               | 10                 | 5              | PUY                  | PUY                  | 100 |
| 271 | Wrotniak 2006        |           | 8-10            | 65   | 7164             | 60  | ---              | 10                 | 6              | PUY                  | PUY                  | 83  |
| 272 | Zahner 2006          | KISS      | grade 1,5       | 502  | 7164             | 60  | 30               | 12/10              | 3+1            | FR-Y                 |                      | 100 |
| 273 | Van Cauwenbergh 2010 |           | 4-6             | 114  | GT1M             | 15  | 10               | 70/80              | 2+1            | EV, PT,<br>SIR & VCB | EV, PT,<br>SIR & VCB | 100 |

<sup>a</sup> calculated as # of key methods reported of 6 divided by the number of relevant methods (i.e., non-relevant methods are removed from the denominator)

<sup>b</sup> reported in main articles as a reference to another article where the information was obtained

<sup>c</sup> imputation procedures used when not enough wearing time obtained

<sup>d</sup> Puyau cut point adjusted using correction factor of .91 for different Actigraph model: MVPA=2172 cpm and Sedentary=727cpm (274)

<sup>e</sup> 20 out of 28 days possible = 5 days

<sup>f</sup> rounded to nearest 100 counts

<sup>g</sup> with allowance of no more than 2 consecutive non-zero counts (245)

<sup>h</sup> used age and age-adjusted METs (275).

*Italics* = unclear reporting and not counted as 'reported' in the reporting score

& = designates Time 1 and Time 2 differences

, = designates group differences at same time point

Blank in table means method 'Not Applicable' to paper

cpm = activity counts per minute

vis inspect = visual inspection of data

manual = manual editing of data

#### VALID WEARING TIME CODES

70/80 = included if  $\geq 80\%$  of wearing time defined by at least 70% of the study population recording data during that time (30)

3/20 = days with > 3 strings of 20 minutes of zeros excluded

10/20 = days with <10,000 or >20 million counts excluded (276)

<10,000 = days with <10,000 counts excluded  
10/8 = 10 hours weekday and 8 hours weekend  
12/10 = 12 hours weekday and 10 hours weekend  
10/60% = 10 hours for weekdays and 60% of mean wear time for weekends  
70% = 70% of a monitoring day to be included  
80% = 80% of a monitoring day to be included  
70/40% = 70% weekday and 40% weekend  
10/10/20 = days with less than 10 hours and <10,000 step counts and > 20,000 counts excluded  
10/150/3sd = days with  $\geq$  10 hours but not < 150 cpm (average) or > 3 standard deviations from the mean

## **STUDY ABBREVIATIONS**

KOALA=KOALA Birth Cohort Study ([Dutch]: Child, Parent and Health: Lifestyle and Genetic Constitution Birth Cohort Study)  
ACORDA= Obese children and adolescent involved in a physical activity and diet program  
AFINOS=Physical Activity as a Preventative Agent of the Development of Overweight, Obesity, Allergies, Infections, and Cardiovascular Risk Factors in Adolescents  
ALSPAC=Avon Longitudinal Study of Parents & Children  
BALTS=Baltimore Active Living Teens Study  
Bunkeflo= Bunkeflo Project  
CALE= Children's Activity in their Local Environment  
CHAMPS=Children's Activity and Movement in Preschool Study  
CHASE=Child Heart Health Study in England  
CL/CL/HPS=CLASS, CLAN, and HEAPS  
CLAN=Children Living in Active Neighborhoods Study  
CoSCIS=Copenhagen School Child Intervention Study  
CV risk factors= Cardiovascular Risk Factors  
DANCER=A Pilot of a Video Game Dance Dance Revolution (DDR) to Promote Physical Activity and Decrease Sedentary Screen Time  
EarlyBird= The EarlyBird Study  
EYHS=European Youth Heart Study – All sites  
EYHS-D=European Youth Heart Study - Danish  
EYHS-D/E= European Youth Heart Study- Danish and Estonia  
EYHS-S=European Youth Heart Study- Sweden  
EYHS-S/E=European Youth Heart Study- Sweden and Estonia  
Fit for Life= Fit for Life Boy Scout badge program  
Fontan= Fontan Cross-Sectional Study by the Pediatric Heart Network (PHN)  
GEMS=Stanford Girls Health Enrichment Multisite Studies  
GMS=Gateshead Millennium Study  
GUA=Growing Up Active Study  
HBV= Human Biological Variability: Implications for Physical Education, Sports, Preventive Medicine and Public Health  
HELENA=Healthy Lifestyle by Nutrition in Adolescence  
HIKCUPS=Hunter Illawarra Kids Challenge Using Parent Support Trial  
IBD=Iowa Bone Development Study  
IMPACT=Interactive Multi-media for Promoting Physical Activity Study  
Iowa Flride=Iowa Fluoride Study

KISS=Kinder-Sportstudie  
KOALA=KOALA Birth Cohort Study [Dutch]: Child, Parent and Health: Lifestyle and Genetic Constitution Birth Cohort Study  
MAGIC=Movement and Activity Intervention in Glasgow Children  
NHANES=National Health and Nutrition Examination Survey  
NICHD=National Institute of Child Health & Human Development  
PACE+= The Patient-Centered Assessment and Counseling for Exercise Plus Nutrition Project  
PACY=Physical Activity in Children and Youth  
PANDA=Preschool Activity 'N' Dietary Adiposity  
PARADE=Partners of All Ages Reading About Diet and Exercise Project  
PEACH=Personal and Environmental Associations with Children's Health Project  
PEACHES= Physical Exercise and Appetite in Children Study  
POP=Malmo Pediatric Osteoporosis Prevention Study  
PRESTYL=Preschool Physical Activity, Body Composition and Lifestyle Study  
Prj EAST=Eating and Activity Survey Trial (Project EAST)  
SCOTT=Scottish Childhood Obesity Treatment Trial  
SHAPES=School Health Action, Planning and Evaluation System  
SPACES=Spatial Planning and Children's Exercise Study  
SPARKLE= Study of Preschool Activity Lifestyle and Energetics  
SPEEDY=Sport, Physical Activity and Eating Behaviour: Environmental Determinants in Young People  
SPORT=The Stanford Sports to Prevent Obesity Randomized Trial  
SprtsLinx= SportsLinx  
Sw-Play=Switen-Play Intervention  
TAAG=Trial of Activity in Adolescent Girls  
WSB=Walking School Bus Program  
YMCLS=Youth Media Campaign Longitudinal Survey  
YRBS=Youth Risk Behavior Study

## **MVPA CUT POINT ABBREVIATIONS**

Counts = activity counts only  
EV = 2296 cpm (Evenson)  
EYHS = 2000 cpm (European Youth Heart Study)  
FR-3 = Freedson youth age-specific cut points using 3-MET values  
FR-4 = Freedson youth age-specific cut points using 4-MET values  
FR-A = 1952 cpm (Freedson adult)  
FR-EE = Freedson youth age-specific equation for energy expenditure outcome  
FR-Y = Freedson youth age-specific cut points without the Metabolic Equivalent Task (MET) value specifically stated  
IND = individualized study-specific cut points  
KRI = 400 cpm (Krishnaveni)  
MAT = 3600/3518 cpm (Mattocks)  
MTC = 2500 cpm (Metcalf)  
PTE = 1680 cpm (Pate)  
PUY = 3200 cpm (Puyau)

SIR = Sirard age-specific cut points (Sirard)  
TR-3 = 1160 cpm (Treuth 3 METs)  
TR-3.8 = 2094 cpm (Treuth 3.8 METs)  
TR-4.6 = 3000 cpm (Treuth 4.6 METs)  
TRS = Trost energy expenditure equation (Trost)  
VCW = 2340 cpm (Van Cauwenberghe)  
WLK1 = 2172 cpm (Welk)  
WLK2 = 1560 cpm (Welk)

#### **SEDENTARY CUT POINT ABBREVIATIONS**

EYHS = 499 cpm (European Youth Heart Study)  
FR [MET] = Freedson youth equation using varied MET values  
KRI = 9 cpm (Krishnaveni)  
MAT = 199 cpm (Mattocks)  
MTC = 999 cpm (Metcalf)  
PTE = 151 cpm (Pate)  
PUY = 799 cpm (Puyau)  
REI = 1099 cpm (Reilly)  
ROW = 299 cpm (Rowlands)  
SIR = Sirard age-specific cut points (Sirard)  
100 = 100 cpm (Treuth, Evenson)

#### **CUT POINT REFERENCES**

EVENSON: Evenson KR, Catellier DJ, Gill K, Ondrak KS, McMurray R. Calibration of two objective measures of physical activity for children. *J Sports Sci.* 2008;26(14),1557-1565.

EUROPEAN YOUTH HEART STUDY (no published calibration study):  
Ekelund U, Sardinha LB, Andersson, et al. Associations between objectively assessed physical activity and indicators of body fatness in 9- and 10-yr old children: a population based study from 4 distinct regions in Europe (the European Youth Heart Study). *Am J Clin Nutr.* 2004; 80, 584-590.

Brage S, Wedderkopp N, Andersen LB, Froberg K. Influence of step frequency on movement intensity predictions with the CSA accelerometer: a field validation study in children. *Pediatr Exerc Sci* 2003;15:277–87.

FREEDSON YOUTH 3 & 4 METs:  
Freedson PS, Sirard J, Debold E, Pate R, Dowda M, Trost S, Sallis JF. Calibration of the Computer Science and Applications, Inc. (CSA) accelerometer. *Med Sci Sports Exerc* 1997; 29(suppl):45.

Freedson PS, Poher D, Janz KF. Calibration of Accelerometer Output for Children. *Med. Sci. Sports Exerc* 2005; 37(11Supp), S523-S530.

Trost SG, Pate RR, Sallis JF, et al. Age and gender differences in objectively measured physical activity in youth. *Med Sci Sports Exerc* 2002; 34:350–5.

FREEDSON ADULT: Freedson PS, Melanson E, Sirard J. Calibration of the Computer Science and Applications, Inc. accelerometer. *Med Sci Sports Exerc.* 1998; 30:777-781.

KRISHNAVENI: Krishnaveni GV, Mills IC, Veena SR, Wootton SA, Wills AK, Coakley PJ, Fisher DJ, Shobha S, Karat SC, Fall CHD. Accelerometers for measuring physical activity behavior in Indian children. *Indian Pediatrics* 2009; 46(12):1055-1062.

MATTOCKS: Mattocks C, Leary S, Ness A, et al. Calibration of an accelerometer during free-living activities in children. *Int J Pediatr Obes.* 2007;2(4):218-226.

METCALF (no published calibration study): Metcalf BS, Voss LD, Wilkin TJ. Accelerometers identify inactive and potentially obese children (EarlyBird 3). *Arch Dis Child* 2002; 87:166–167

PATE: Pate RR, Almeida MJ, McIver KL, Pfeiffer KA, Dowda M. Validation and calibration of an accelerometer in preschool children. *Obesity* 2006;14:2000-2006.

PUYAU: Puyau, MR, Adolph, AL, Vohra FA, Butte NF. Validation and calibration of physical activity monitors in children. *Obes Res.* 2002;10,150-157.

REILLY: Reilly JJ, Coyle J, Kelly L, Burke G, Grant S, Paton JY. An Objective Method for Measurement of Sedentary Behavior in 3- to 4-Year Olds. *Obesity* 2003;11:1155-1158.

ROWLANDS (no published calibration study): Rowlands AV, Pilgrim EL, Eston RG. Patterns of Habitual Activity across Weekdays and Weekend Days in 9-11-Year-Old Children. *Prev Med.* 2008;46(4):317-24.

SIRARD: Sirard JR, Trost SG, Pfeiffer KA, Dowda M, Pate R. Calibration and evaluation of an objective measure of physical activity in preschool children. *J Phys Act Health.* 2005;3:345-357.

TREUTH 3 AND 3.8 METS: Pate RR, Stevens J, Pratt C, et al. Objectively measured physical activity in sixth-grade girls. *Arch Pediatr Adolesc Med.* 2006;160(12):1262-1268.

TREUTH 4.6 METS: Treuth MS, Schmitz K, Catellier DJ, et al. Defining accelerometer thresholds for activity intensities in adolescent girls. *Med Sci Sports Exerc.* 2004; 36(7):1259-1266.

TROST: Trost SG, Ward DS, Moorehead SM, Watson PD, Riner W, Burke JR. Validity of the Computer Science and Applications (CSA) activity monitor in children. *Med. Sci. Sports Exerc.* 1998; 30:629–633.

VAN CAUWENBERGHE: Van Cauwenberghe E, Labarque V, Trost SG, Bourdeaudhuij I de, Cardon G. *Int J Pediatr Obes.* 2011; 6(2-2): e582-e589

WELK: Welk GJ. Principles of design and analyses for the calibration of accelerometry-based activity monitors. *Med Sci Sports Exerc.* 2005; 37: S501-S511

## TABLE REFERENCES

1. Adams MA, Caparosa S, Thompson S, Norman GJ. Translating physical activity recommendations for overweight adolescents to steps per day. *Am J Prev Med* 2009;37(2):137-140.
2. Aires L, Santos R, Silva P, Santos P, Oliveira J, Ribeiro JC, Rego C, Mota J. Daily differences in patterns of physical activity among overweight/obese children engaged in a physical activity program. *American Journal Of Human Biology* 2007;19(6):871-877.
3. Aires L, Silva P, Silva G, Santos MP, Ribeiro JC, Mota J. Intensity of physical activity, cardiorespiratory fitness, and body mass index in youth. *J Phys Act Health.* 2010;7(1):54-59.
4. Alhassan S, Sirard JR, Robinson TN. The effects of increasing outdoor play time on physical activity in Latino preschool children. *Int J Pediatr Obes.* 2007;2(3):153-158.
5. Alhassan S, Robinson TN. Objectively measured physical activity and cardiovascular disease risk factors in African American girls. *Ethnicity & Disease* 2008;18(4):421-426.
6. Alwis G, Linden C, Dencker M, Stenevi-Lundgren S, Gardsell P, Karlsson MK. Bone mineral accrual and gain in skeletal width in pre-pubertal school children is independent of the mode of school transportation--one-year data from the prospective observational pediatric osteoporosis prevention (POP) study. *BMC Musculoskeletal Disorders* 2007;8:66-66.
7. Alwis G, Linden C, Ahlborg HG, Dencker M, Gardsell P, Karlsson MK. A 2-year school-based exercise programme in pre-pubertal boys induces skeletal benefits in lumbar spine. *Acta Paediatrica* 2008;97(11):1564-1571.
8. Anderson CB, Hagströmer M, Yngve A. Validation of the PDPAR as an adolescent diary: effect of accelerometer cut points. *Med Sci Sports Exerc.* 2005;37(7):1224-1230.
9. Andersen LB, Harro M, Sardinha LB, Froberg K, Ekelund U, Brage S, Anderssen SA. Physical activity and clustered cardiovascular risk in children: a cross-sectional study (The European Youth Heart Study). *Lancet* 2006;368(9532):299-304.
10. Anderson CB, Mâsse LC, Hergenroeder AC. Factorial and construct validity of the athletic identity questionnaire for adolescents. *Med Sci Sports Exerc.* 2007;39(1):59-69.
11. Aznar S, Webster AL, San Juan AF, Chamorro-Viña C, Maté-Muñoz JL, Moral S, Pérez M, García-Castro J, Ramírez M, Madero L and others. Physical activity during treatment in children with leukemia: a pilot study. *Applied Physiology, Nutrition, And Metabolism* 2006;31(4):407-413.
12. Baggett CD, Stevens J, McMurray RG, Evenson KR, Murray DM, Catellier DJ, He K. Tracking of physical activity and inactivity in middle school girls. *Med Sci Sports Exerc.* 2008;40(11):1916-1922.
13. Baggett CD, Stevens J, Catellier DJ, Evenson KR, McMurray RG, He K, Treuth MS. Compensation or displacement of physical activity in middle-school girls: the Trial of Activity for Adolescent Girls. *Int J Obes* 2010;34(7):1193-1199.
14. Bagley S, Salmon J, Crawford D. Family structure and children's television viewing and physical activity. *Med Sci Sports Exerc.* 2006;38(5):910-918.
15. Baker BL, Birch LL, Trost SG, Davison KK. Advanced pubertal status at age 11 and lower physical activity in adolescent girls. *J Pediatr* 2007;151(5):488-493.
16. Ball K, Cleland VJ, Timperio AF, Salmon J, Crawford DA. Socioeconomic position and children's physical activity and sedentary behaviors: longitudinal findings from the CLAN study. *J Phys Act Health.* 2009;6(3):289-298.
17. Baquet G, Stratton G, Van Praagh E, Berthoin S. Improving physical activity assessment in prepubertal children with high-frequency accelerometry monitoring: a methodological issue. *Prev Med* 2007;44(2):143-147.
18. Basterfield L, Adamson AJ, Parkinson KN, Maute U, Li PX, Reilly JJ. Surveillance of physical activity in the UK is flawed: validation of the Health Survey for England Physical Activity Questionnaire. *Arch Dis Child* 2008;93(12):1054-1058.
19. Bender JM, Brownson RC, Elliott MB, Haire-Joshu DL. Children's physical activity: using accelerometers to validate a parent proxy record. *Med Sci Sports Exerc.* 2005;37(8):1409-1413.
20. Brito EC, Vimalaswaran KS, Brage S, Andersen LB, Sardinha LB, Wareham NJ, Ekelund U, Loos RJJ, Franks PW. PPARGC1A sequence variation and cardiovascular risk-factor levels: a study of the main genetic effects and gene x environment interactions in children from the European Youth Heart Study. *Diabetologia* 2009;52(4):609-613.

21. Brockman R, Jago R, Fox KR. The contribution of active play to the physical activity of primary school children. *Prev Med* 2010;51(2):144-147.
22. Byrd-Williams C, Kelly LA, Davis JN, Spruijt-Metz D, Goran MI. Influence of gender, BMI and Hispanic ethnicity on physical activity in children. *Int J Pediatr Obes.*2007;2(3):159-166.
23. Cardon G, De Bourdeaudhuij I. Comparison of pedometer and accelerometer measures of physical activity in preschool children. *Pediatr Exerc Sci* 2007;19(2):205-214.
24. Cardon GM, De Bourdeaudhuij IMM. Are preschool children active enough? Objectively measured physical activity levels. *Res Q Exer Sport* 2008;79(3):326-332.
25. Carver A, Timperio AF, Crawford DA. Neighborhood road environments and physical activity among youth: the CLAN study. *Journal Of Urban Health* 2008;85(4):532-544.
26. Carver A, Timperio A, Crawford D. Perceptions of neighborhood safety and physical activity among youth: the CLAN study. *J Phys Act Health.* 2008;5(3):430-444.
27. Carver A, Timperio A, Hesketh K, Crawford D. Are safety-related features of the road environment associated with smaller declines in physical activity among youth? *Journal Of Urban Health* 2010;87(1):29-43.
28. Casazza K, Dulin-Keita A, Gower BA, Fernandez JR. Differential influence of diet and physical activity on components of metabolic syndrome in a multiethnic sample of children. *Journal Of The American Dietetic Association* 2009;109(2):236-244.
29. Casazza K, Gower BA, Willig AL, Hunter GR, Fernandez JR. Physical fitness, activity, and insulin dynamics in early pubertal children. *Pediatr Exerc Sci* 2009;21(1):63-76.
30. Catellier DJ, Hannan PJ, Murray DM, Addy CL, Conway TL, Yang S, Rice JC. Imputation of missing data when measuring physical activity by accelerometry. *Med Sci Sports Exerc.*2005;37(11 Suppl):S555-S562.
31. Cleland V, Crawford D, Baur LA, Hume C, Timperio A, Salmon J. A prospective examination of children's time spent outdoors, objectively measured physical activity and overweight. *Int J Obesity* 2008;32(11):1685-1693.
32. Cliff DP, Okely AD, Smith LM, McKeen K. Relationships between fundamental movement skills and objectively measured physical activity in preschool children. *Pediatr Exerc Sci* 2009;21(4):436-449.
33. Cohen DA, Ashwood JS, Scott MM, Overton A, Evenson KR, Staten LK, Porter D, McKenzie TL, Catellier D. Public parks and physical activity among adolescent girls. *Pediatrics* 2006;118(5):e1381-e1389.
34. Cooper AR, Andersen LB, Wedderkopp N, Page AS, Froberg K. Physical activity levels of children who walk, cycle, or are driven to school. *Am J Prev Med* 2005;29(3):179-184.
35. Cooper AR, Wedderkopp N, Wang H, Andersen LB, Froberg K, Page AS. Active travel to school and cardiovascular fitness in Danish children and adolescents. *Med Sci Sports Exerc.*2006;38(10):1724-1731.
36. Cooper AR, Page AS, Wheeler BW, Griew P, Davis L, Hillsdon M, Jago R. Mapping the walk to school using accelerometry combined with a global positioning system. *Am J Prev Med* 2010;38(2):178-183.
37. Cooper AR, Page AS, Wheeler BW, Hillsdon M, Griew P, Jago R. Patterns of GPS measured time outdoors after school and objective physical activity in English children: the PEACH project. *Int J Behav Nutr Phys Act*2010; 7: 31.
38. Corder K, van Sluijs EMF, McMinn AM, Ekelund U, Cassidy A, Griffin SJ. Perception versus reality awareness of physical activity levels of British children. *Am J Prev Med* 2010;38(1):1-8.
39. Davison KK, Jago R. Change in parent and peer support across ages 9 to 15 yr and adolescent girls' physical activity. *Med Sci Sports Exerc.*2009;41(9):1816-1825.
40. Davison KK, Deane GD. The consequence of encouraging girls to be active for weight loss. *Soc Sci Med* 2010;70(4):518-525.
41. Davison KK, Schmalz DL, Downs DS. Hop, skip... no! Explaining adolescent girls' disinclination for physical activity. *Ann Behav Med* 2010;39(3):290-302.
42. De Vries SI, Hopman-Rock M, Bakker I, Van Mechelen W. Meeting the 60-min physical activity guideline: effect of operationalization. *Med Sci Sports Exerc.*2009;41(1):81-86.
43. Deforche B, Bourdeaudhuij BI, D'hondt E, Cardon G. Objectively measured physical activity, physical activity related personality and body mass index in 6- to 10-yr-old children: a cross-sectional study. Objectively measured physical activity, physical activity related personality and body mass index in 6- to 10-yr-old children: a cross-sectional study. *Int J Behav Nutr Phys Act* 2009;6(25).
44. Dencker M, Thorsson O, Karlsson MK, Lindén C, Eiberg S, Wollmer P, Andersen LB. Daily physical activity related to body fat in children aged 8-11 years. *J Pediatr*2006;149(1):38-42.
45. Dencker M, Thorsson O, Karlsson MK, Lindén C, Svensson J, Wollmer P, Andersen LB. Daily physical activity in Swedish children aged 8-11 years. *Scand J Med Sci Sports* 2006;16(4):252-257.
46. Dencker M, Thorsson O, Karlsson MK, Lindén C, Svensson J, Wollmer P, Andersen LB. Daily physical activity and its relation to aerobic fitness in children aged 8-11 years. *European Journal Of Applied Physiology* 2006;96(5):587-592.
47. Dencker M, Thorsson O, Karlsson MK, Lindén C, Eiberg S, Wollmer P, Andersen LB. Gender differences and determinants of aerobic fitness in children aged 8-11 years. *European Journal Of Applied Physiology* 2007;99(1):19-26.
48. Dencker M, Thorsson O, Karlsson MK, Lindén C, Wollmer P, Andersen LB. Daily physical activity related to aerobic fitness and body fat in an urban sample of children. *Scand J Med Sci Sports* 2008;18(6):728-735.
49. Dencker M, Thorsson O, Karlsson MK, Lindén C, Eiberg S, Wollmer P, Andersen LB, Ahrén B. Body fat related to daily physical activity and insulin concentrations in non-diabetic children. *Clinical Physiology And Functional Imaging* 2008;28(4):211-215.

50. Dencker M, Thorsson O, Karlsson MK, Lindén C, Wollmer P, Andersen LB. Objectively measured daily physical activity related to cardiac size in young children. *Scand J Med Sci Sports* 2009;19(5):664-668.
51. Dencker M, Bugge A, Hermansen B, Andersen LB. Objectively measured daily physical activity related to aerobic fitness in young children. *J Sports Sci.* 2010;28(2):139-145.
52. Dishman RK, Dunn AL, Sallis JF, Vandenberg RJ, Pratt CA. Social-cognitive correlates of physical activity in a multi-ethnic cohort of middle-school girls: two-year prospective study. *Journal Of Pediatric Psychology* 2010;35(2):188-198.
53. Dowda M, McKenzie TL, Cohen DA, Scott MM, Evenson KR, Bedimo-Rung AL, Voorhees CC, Almeida MJCA. Commercial venues as supports for physical activity in adolescent girls. *Prev Med* 2007;45(2-3):163-168.
54. Dowda M, Brown WH, McIver KL, Pfeiffer KA, O'Neill JR, Addy CL, Pate RR. Policies and characteristics of the preschool environment and physical activity of young children. *Pediatrics* 2009;123(2):e261-e266.
55. Dziewaltowski D, Rosenkranz R, Geller K, Coleman L, Welk G, Hastmann T, Milliken G. HOP'N after-school project: an obesity prevention randomized controlled trial. *Int J Behav Nutr Phys Act* 2010;7(90).
56. Eiberg S, Hasselstrom H, Grønfeldt V, Froberg K, Svensson J, Andersen LB. Maximum oxygen uptake and objectively measured physical activity in Danish children 6-7 years of age: the Copenhagen school child intervention study. *Br J Sports Med* 2005;39(10):725-730.
57. Eijkemans M, Mommers M, de Vries SI, van Buuren S, Stafleu A, Bakker I, Thijs C. Asthmatic symptoms, physical activity, and overweight in young children: a cohort study. *Pediatrics* 2008;121(3):e666-e672.
58. Eisenman JC, Sarzynski MA, Tucker J, Heelan KA. Maternal prepregnancy overweight and offspring fatness and blood pressure: role of physical activity. *Pediatr Exerc Sci* 2010;22(3):369-378.
59. Ekelund U, Neovius M, Linné Y, Rössner S. The criterion validity of a last 7-day physical activity questionnaire (SAPAQ) for use in adolescents with a wide variation in body fat: the Stockholm Weight Development Study. *Int J Obes*(2005) 2006;30(6):1019-1021.
60. Ekelund U, Brage S, Froberg K, Harro M, Anderssen SA, Sardinha LB, Riddoch C, Andersen LB. TV viewing and physical activity are independently associated with metabolic risk in children: the European Youth Heart Study. *Plos Medicine* 2006;3(12):e488-e488.
61. Ekelund U, Särnblad S, Brage S, Ryberg J, Wareham NJ, Aman J. Does physical activity equally predict gain in fat mass among obese and nonobese young adults? *Int J Obes* 2007;31(1):65-71.
62. Epstein LH, Roemmich JN, Paluch RA, Raynor HA. Influence of changes in sedentary behavior on energy and macronutrient intake in youth. *Am J Clin Nutr* 2005;81(2):361-366.
63. Epstein LH, Roemmich JN, Paluch RA, Raynor HA. Physical activity as a substitute for sedentary behavior in youth. *Ann Behav Med* 2005;29(3):200-209.
64. Esliger DW, Tremblay MS, Copeland JL, Barnes JD, Huntington GE, Bassett DR, Jr. Physical activity profile of Old Order Amish, Mennonite, and contemporary children. *Med Sci Sports Exerc.* 2010;42(2):296-303.
65. Evenson KR, Scott MM, Cohen DA, Voorhees CC. Girls' perception of neighborhood factors on physical activity, sedentary behavior, and BMI. *Obesity* 2007;15(2):430-445.
66. Evenson KR, Murray DM, Birnbaum AS, Cohen DA. Examination of perceived neighborhood characteristics and transportation on changes in physical activity and sedentary behavior: The Trial of Activity in Adolescent Girls. *Health & Place* 2010;16(5):977-985.
67. Fairclough SJ, Butcher ZH, Stratton G. Whole-day and segmented-day physical activity variability of northwest England school children. *Prev Med* 2007;44(5):421-425.
68. Fairclough SJ, Ridgers ND. Relationships between maturity status, physical activity, and physical self-perceptions in primary school children. *J Sports Sci.* 2010;28(1):1-9.
69. Fisher A, Reilly JJ, Kelly LA, Montgomery C, Williamson A, Paton JY, Grant S. Fundamental movement skills and habitual physical activity in young children. *Med Sci Sports Exerc.* 2005;37(4):684-688.
70. Gaya AR, Alves A, Aires L, Martins CL, Ribeiro JC, Mota J. Association between time spent in sedentary, moderate to vigorous physical activity, body mass index, cardiorespiratory fitness and blood pressure. *Annals Of Human Biology* 2009;36(4):379-387.
71. Gidlow CJ, Cochrane T, Davey R, Smith H. In-school and out-of-school physical activity in primary and secondary school children. *J Sports Sci.* 2008;26(13):1411-1419.
72. Goran MI, Reynolds K. Interactive multimedia for promoting physical activity (IMPACT) in children. *Obes Res* 2005;13(4):762-771.
73. Griew P, Page A, Thomas S, Hillsdon M, Cooper AR. The school effect on children's school time physical activity: the PEACH Project. *Prev Med* 2010;51(3-4):282-286.
74. Guinhouya CB, Soubrier S, Vilhelm C, Ravaux P, Lemdani M, Durocher A, Hubert H. Physical activity and sedentary lifestyle in children as time-limited functions: usefulness of the principal component analysis method. *Behavior Research Methods* 2007;39(3):682-688.
75. Guinhouya BC, Lemdani M, Vilhelm C, Hubert H, Apété GK, Durocher A. How school time physical activity is the "big one" for daily activity among schoolchildren: a semi-experimental approach. *J Phys Act Health.* 2009;6(4):510-519.
76. Gutin B, Howe C, Johnson MH, Humphries MC, Snieder H, Barbeau P. Heart rate variability in adolescents: relations to physical activity, fitness, and adiposity. *Med Sci Sports Exerc.* 2005;37(11):1856-1863.

77. Gutin B, Yin Z, Humphries MC, Barbeau P. Relations of moderate and vigorous physical activity to fitness and fatness in adolescents. *Am J Clin Nutr* 2005;81(4):746-750.
78. Gwynn JD, Hardy LL, Wiggers JH, Smith WT, D'Este CA, Turner N, Cochrane J, Barker DJ, Attia JR. The validation of a self-report measure and physical activity of Australian Aboriginal and Torres Strait Islander and non-Indigenous rural children. *Australian And New Zealand Journal Of Public Health* 2010;34 Suppl 1:S57-S65.
79. Haerens L, Deforche B, Maes L, Cardon G, Stevens V, De Bourdeaudhuij I. Evaluation of a 2-year physical activity and healthy eating intervention in middle school children. *Health Education Research* 2006;21(6):911-921.
80. Haerens L, Deforche B, Maes L, Cardon G, De Bourdeaudhuij I. Physical activity and endurance in normal weight versus overweight boys and girls. *J Sports Med Phys Fitness* 2007;47(3):344-350.
81. Haerens L, De Bourdeaudhuij I, Maes L, Cardon G, Deforche B. School-based randomized controlled trial of a physical activity intervention among adolescents. *The Journal Of Adolescent Health* 2007;40(3):258-265.
82. Hager RL. Television viewing and physical activity in children. *The Journal Of Adolescent Health: Official Publication Of The Society For Adolescent Medicine* 2006;39(5):656-661.
83. Hagler AS, Calfas KJ, Norman GJ, Sallis JF, Patrick K. Construct validity of physical activity and sedentary behaviors staging measures for adolescents. *Ann Behav Med* 2006;31(2):186-193.
84. Hagströmer M, Bergman P, De Bourdeaudhuij I, Ortega FB, Ruiz JR, Manios Y, Rey-López JP, Phillipp K, von Berlepsch J, Sjöström M. Concurrent validity of a modified version of the International Physical Activity Questionnaire (IPAQ-A) in European adolescents: The HELENA Study. *Int J Obes* 2008;32 Suppl 5:S42-S48.
85. Hannon JC, Brown BB. Increasing preschoolers' physical activity intensities: an activity-friendly preschool playground intervention. *Prev Med* 2008;46(6):532-536.
86. Hansen SE, Hasselstrøm H, Grønfeldt V, Froberg K, Andersen LB. Cardiovascular disease risk factors in 6-7-year-old Danish children: the Copenhagen School Child Intervention Study. *Prev Med* 2005;40(6):740-746.
87. Hasselstrøm H, Karlsson KM, Hansen SE, Grønfeldt V, Froberg K, Andersen LB. Peripheral bone mineral density and different intensities of physical activity in children 6-8 years old: the Copenhagen School Child Intervention study. *Calcif Tissue Int* 2007;80(1):31-38.
88. Hasselstrøm HA, Karlsson MK, Hansen SE, Grønfeldt V, Froberg K, Andersen LB. A 3-year physical activity intervention program increases the gain in bone mineral and bone width in prepubertal girls but not boys: the prospective copenhagen school child interventions study (CoSCIS). *Calcif Tissue Int* 2008;83(4):243-250.
89. Heath JA, Ramzy JM, Donath SM. Physical activity in survivors of childhood acute lymphoblastic leukaemia. *Journal Of Paediatrics And Child Health* 2010;46(4):149-153.
90. Heelan KA, Abbey BM, Donnelly JE, Mayo MS, Welk GJ. Evaluation of a walking school bus for promoting physical activity in youth. *J Phys Act Health*. 2009;6(5):560-567.
91. Heilman K, Zilmer M, Zilmer K, Tillmann V. Lower bone mineral density in children with type 1 diabetes is associated with poor glycemic control and higher serum ICAM-1 and urinary isoprostane levels. *Journal Of Bone And Mineral Metabolism* 2009;27(5):598-604.
92. Hennessy E, Hughes S, Goldberg J, Hyatt R, Economos C. Parent-child interactions and objectively measured child physical activity: a cross-sectional study. *Int J Behav Nutr Phys Act* 2010;7(71).
93. Hesketh K, Crawford D, Salmon J. Children's television viewing and objectively measured physical activity: associations with family circumstance. *Int J Behav Nutr Phys Act* 2006;3(36).
94. Holmes ME, Eisenmann JC, Ekkekakis P, Gentile D. Physical activity, stress, and metabolic risk score in 8- to 18-year-old boys. *J Phys Act Health*. 2008;5(2):294-307.
95. Hopkins ND, Stratton G, Tinken TM, McWhannell N, Ridgers ND, Graves LEF, George K, Cable NT, Green DJ. Relationships between measures of fitness, physical activity, body composition and vascular function in children. *Atherosclerosis* 2009;204(1):244-249.
96. Houwen S, Hartman E, Visscher C. Physical activity and motor skills in children with and without visual impairments. *Med Sci Sports Exerc*. 2009;41(1):103-109.
97. Hughes AR, Henderson A, Ortiz-Rodriguez V, Artinou ML, Reilly JJ. Habitual physical activity and sedentary behaviour in a clinical sample of obese children. *Int J Obes* 2006;30(10):1494-1500.
98. Hume C, Salmon J, Ball K. Children's perceptions of their home and neighborhood environments, and their association with objectively measured physical activity: a qualitative and quantitative study. *Health Education Research* 2005;20(1):1-13.
99. Hume C, Salmon J, Ball K. Associations of children's perceived neighborhood environments with walking and physical activity. *American Journal Of Health Promotion* 2007;21(3):201-207.
100. Hume C, Okely A, Bagley S, Telford A, Booth M, Crawford D, Salmon J. Does weight status influence associations between children's fundamental movement skills and physical activity? *Res Q Exer Sport* 2008;79(2):158-165.
101. Hurtig-Wennlöf A, Ruiz JR, Harro M, Sjöström M. Cardiorespiratory fitness relates more strongly than physical activity to cardiovascular disease risk factors in healthy children and adolescents: the European Youth Heart Study. *European Journal Of Cardiovascular Prevention And Rehabilitation* 2007;14(4):575-581.
102. Jago R, Baranowski T, Zakeri I, Harris M. Observed environmental features and the physical activity of adolescent males. *Am J Prev Med* 2005;29(2):98-104.
103. Jago R, Anderson CB, Baranowski T, Watson K. Adolescent patterns of physical activity differences by gender, day, and time of day. *Am J Prev Med* 2005;28(5):447-452.
104. Jago R, Baranowski T, Baranowski JC, Thompson D, Cullen KW, Watson K, Liu Y. Fit for Life Boy Scout badge: outcome evaluation of a troop and Internet intervention. *Prev Med* 2006;42(3):181-187.
105. Jago R, Baranowski T, Baranowski JC. Observed, GIS, and self-reported environmental features and adolescent physical activity. *American Journal Of Health Promotion* 2006;20(6):422-428.

106. Jago R, Baranowski T, Baranowski JC, Cullen KW, Thompson DI. Social desirability is associated with some physical activity, psychosocial variables and sedentary behavior but not self-reported physical activity among adolescent males. *Health Education Research* 2007;22(3):438-449.
107. Jago R, Wedderkopp N, Kristensen PL, Møller NC, Andersen LB, Cooper AR, Froberg K. Six-year change in youth physical activity and effect on fasting insulin and HOMA-IR. *Am J Prev Med* 2008;35(6):554-560.
108. Jago R, Fox K, Page A, Brockman R, Thompson J. Physical activity and sedentary behaviour typologies of 10-11 year olds. *Int J Behav Nutr Phys Act* 2010;7(59).
109. Jago R, Ness AR, Emmett P, Mattocks C, Jones L, Riddoch CJ. Obesogenic diet and physical activity: independent or associated behaviours in adolescents? *Public Health Nutrition* 2010;13(5):673-681.
110. Janz KF, Burns TL, Levy SM. Tracking of activity and sedentary behaviors in childhood: the Iowa Bone Development Study. *Am J Prev Med* 2005;29(3):171-178.
111. Janz KF, Gilmore JM, Burns TL, Levy SM, Torner JC, Willing MC, Marshall TA. Physical activity augments bone mineral accrual in young children: The Iowa Bone Development study. *J Pediatr* 2006;148(6):793-799.
112. Janz KF, Gilmore JME, Levy SM, Letuchy EM, Burns TL, Beck TJ. Physical activity and femoral neck bone strength during childhood: the Iowa Bone Development Study. *Bone* 2007;41(2):216-222.
113. Janz KF, Letuchy EM, Wenthe P, Levy SM. Measuring activity in children and adolescents using self-report: PAQ-C and PAQ-A. *Med Sci Sports Exerc.* 2008;40(4):767-772.
114. Janz KF, Medema-Johnson HC, Letuchy EM, Burns TL, Gilmore JME, Torner JC, Willing M, Levy SM. Subjective and objective measures of physical activity in relationship to bone mineral content during late childhood: the Iowa Bone Development Study. *Br J Sports Med* 2008;42(8):658-663.
115. Janz KF, Kwon S, Letuchy EM, Eichenberger Gilmore JM, Burns TL, Torner JC, Willing MC, Levy SM. Sustained effect of early physical activity on body fat mass in older children. *Am J Prev Med* 2009;37(1):35-40.
116. Janz KF, Letuchy EM, Eichenberger Gilmore JM, Burns TL, Torner JC, Willing MC, Levy SM. Early physical activity provides sustained bone health benefits later in childhood. *Med Sci Sports Exerc.* 2010;42(6):1072-1078.
117. Johnson CC, Murray DM, Elder JP, Jobe JB, Dunn AL, Kubik M, Voorhees C, Schachter K. Depressive symptoms and physical activity in adolescent girls. *Med Sci Sports Exerc.* 2008;40(5):818-826.
118. Kelly LA, Reilly JJ, Grant S, Paton JY. Low physical activity levels and high levels of sedentary behaviour are characteristic of rural Irish primary school children. *Irish Medical Journal* 2005;98(5):138-141.
119. Kelly LA, Reilly JJ, Fisher A, Montgomery C, Williamson A, McColl JH, Paton JY, Grant S. Effect of socioeconomic status on objectively measured physical activity. *Arch Dis Child* 2006;91(1):35-38.
120. Kelly LA, Reilly JJ, Jackson DM, Montgomery C, Grant S, Paton JY. Tracking physical activity and sedentary behavior in young children. *Pediatr Exerc Sci* 2007;19(1):51-60.
121. Kelly EB, Parra-Medina D, Pfeiffer KA, Dowda M, Conway TL, Webber LS, Jobe JB, Going S, Pate RR. Correlates of physical activity in black, Hispanic, and white middle school girls. *J Phys Act Health.* 2010;7(2):184-193.
122. Kligerman M, Sallis JF, Ryan S, Frank LD, Nader PR. Association of neighborhood design and recreation environment variables with physical activity and body mass index in adolescents. *American Journal Of Health Promotion* 2007;21(4):274-277.
123. Kolle E, Steene-Johannessen J, Andersen LB, Anderssen SA. Seasonal variation in objectively assessed physical activity among children and adolescents in Norway: a cross-sectional study. *Int J Behav Nutr Phys Act* 2009;6:36.
124. Kriemler S, Zahner L, Puder JJ, Braun-Fahrländer C, Schindler C, Farpour-Lambert NJ, Kränzlin M, Rizzoli R. Weight-bearing bones are more sensitive to physical exercise in boys than in girls during pre- and early puberty: a cross-sectional study. *Osteoporosis International* 2008;19(12):1749-1758.
125. Kriemler S, Zahner L, Schindler C, Meyer U, Hartmann T, Hebestreit H, Brunner-La Rocca HP, van Mechelen W, Puder JJ. Effect of school based physical activity programme (KISS) on fitness and adiposity in primary schoolchildren: cluster randomised controlled trial. *BMJ (Clinical Research Ed.)* 2010;340:c785-c785.
126. Krishnaveni GV, Mills IC, Veena SR, Wootton SA, Wills AK, Coakley PJ, Fisher DJ, Shobha S, Karat SC, Fall CHD. Accelerometers for measuring physical activity behavior in Indian children. *Indian Pediatrics* 2009;46(12):1055-1062.
127. Kristensen PL, Korsholm L, Møller NC, Wedderkopp N, Andersen LB, Froberg K. Sources of variation in habitual physical activity of children and adolescents: the European youth heart study. *Scand J Med Sci Sports* 2008;18(3):298-308.
128. Kristensen PL, Møller NC, Korsholm L, Wedderkopp N, Andersen LB, Froberg K. Tracking of objectively measured physical activity from childhood to adolescence: the European youth heart study. *Scand J Med Sci Sports* 2008;18(2):171-178.
129. Lanctot JQ, Klesges RC, Stockton MB, Klesges LM. Prevalence and characteristics of energy underreporting in African-American girls. *Obesity* 2008;16(6):1407-1412.
130. Leary SD, Ness AR, Smith GD, Mattocks C, Deere K, Blair SN, Riddoch C. Physical activity and blood pressure in childhood: findings from a population-based study. *Hypertension* 2008;51(1):92-98.
131. Lohman TG, Ring K, Schmitz KH, Truth MS, Loftin M, Yang S, Sothorn M, Going S. Associations of body size and composition with physical activity in adolescent girls. *Med Sci Sports Exerc.* 2006;38(6):1175-1181.
132. Lohman TG, Ring K, Pfeiffer K, Camhi S, Arredondo E, Pratt C, Pate R, Webber LS. Relationships among fitness, body composition, and physical activity. *Med Sci Sports Exerc.* 2008;40(6):1163-1170.

133. Lopes VP, Vasques CMS, Maia JAR, Ferreira JCV. Habitual physical activity levels in childhood and adolescence assessed with accelerometry. *J Sports Med Phys Fitness* 2007;47(2):217-222.
134. Loprinzi PD, Trost SG. Parental influences on physical activity behavior in preschool children. *Prev Med* 2010;50(3):129-133.
135. Maddison R, Jiang Y, Vander Hoorn S, Exeter D, Mhurchu CN, Dorey E. Describing patterns of physical activity in adolescents using global positioning systems and accelerometry. *Pediatr Exerc Sci* 2010;22(3):392-407.
136. Maggio ABR, Hofer MF, Martin XE, Marchand LM, Beghetti M, Farpour-Lambert NJ. Reduced physical activity level and cardiorespiratory fitness in children with chronic diseases. *European Journal Of Pediatrics* 2010;169(10):1187-1193.
137. Magnússon KT, Sveinsson T, Arngrímsson SA, Johannsson E. Predictors of fatness and physical fitness in nine-year-old Icelandic school children. *Int J Pediatr Obes.* 2008;3(4):217-225.
138. Maloney AE, Bethea TC, Kelsey KS, Marks JT, Paez S, Rosenberg AM, Catellier DJ, Hamer RM, Sikich L. A pilot of a video game (DDR) to promote physical activity and decrease sedentary screen time. *Obesity* 2008;16(9):2074-2080.
139. Mark AE, Janssen I. Dose-response relation between physical activity and blood pressure in youth. *Med Sci Sports Exerc.* 2008;40(6):1007-1012.
140. Mark AE, Janssen I. Influence of bouts of physical activity on overweight in youth. *Am J Prev Med* 2009;36(5):416-421.
141. Martínez-Gómez D, Eisenmann JC, Moya JM, Gómez-Martínez S, Marcos A, Veiga OL. The role of physical activity and fitness on the metabolic syndrome in adolescents: effect of different scores. The AFINOS Study. *Journal Of Physiology And Biochemistry* 2009;65(3):277-289.
142. Martinez-Gomez D, Tucker J, Heelan KA, Welk GJ, Eisenmann JC. Associations between sedentary behavior and blood pressure in young children. *Arch Pediatr Adolesc Med* 2009;163(8):724-730.
143. Martínez-Gómez D, Welk GJ, Calle ME, Marcos A, Veiga OL. Preliminary evidence of physical activity levels measured by accelerometer in Spanish adolescents; The AFINOS Study. *Nutricion Hospitalaria* 2009;24(2):226-232.
144. Martinez-Gomez D, Ortega, F, Veiga O, Moliner-Urdiales D, Mauro B, Galfo M, Manios, Y, Widhalm K, Béghin L, Moreno L, Molnar D, Marcos A, Sjöström M. Recommended Levels of Physical Activity to Avoid an Excess of Body Fat in European Adolescents. The HELENA Study. *Am J Prev Med* 2010; 39: 203-211.
145. Martínez-Gómez D, Eisenmann JC, Gómez-Martínez S, Veses A, Marcos A, Veiga OL. Sedentary behavior, adiposity and cardiovascular risk factors in adolescents. The AFINOS study. *Revista Española De Cardiología* 2010;63(3):277-285.
146. Martinez-Gomez D, Tucker J, Heelan KA, Welk GJ, Eisenmann JC. Associations between Martínez-Gómez D, Wärnberg J, Welk GJ, Sjöström M, Veiga OL, Marcos A. Validity of the Bouchard activity diary in Spanish adolescents. *Public Health Nutrition* 2010;13(2):261-268.
147. Mattocks C, Leary S, Ness A, Deere K, Saunders J, Kirkby J, Blair SN, Tilling K, Riddoch C. Intraindividual variation of objectively measured physical activity in children. *Med Sci Sports Exerc.* 2007;39(4):622-629.
148. Mattocks C, Leary S, Ness A, Deere K, Saunders J, Tilling K, Kirkby J, Blair SN, Riddoch C. Calibration of an accelerometer during free-living activities in children. *Int J Pediatr Obes.* 2007;2(4):218-226.
149. Mattocks C, Ness A, Deere K, Tilling K, Leary S, Blair SN, Riddoch C. Early life determinants of physical activity in 11 to 12 year olds: cohort study. *BMJ (Clinical Research Ed.)* 2008;336(7634):26-29.
150. Mattocks C, Ness A, Leary S, Tilling K, Blair SN, Shield J, Deere K, Saunders J, Kirkby J, Smith GD and others. Use of accelerometers in a large field-based study of children: protocols, design issues, and effects on precision. *J Phys Act Health.* 2008;5 Suppl 1:S98-S111.
151. McCrindle BW, Williams RV, Mital S, Clark BJ, Russell JL, Klein G, Eisenmann JC. Physical activity levels in children and adolescents are reduced after the Fontan procedure, independent of exercise capacity, and are associated with lower perceived general health. *Arch Dis Child* 2007;92(6):509-514.
152. McGall SE, McGuigan MR, Nottle C. Contribution of Free Play towards Physical Activity Guidelines for New Zealand Primary School Children Aged 7-9 years. *Br J Sports Med* 2009.
153. McLure SA, Summerbell CD, Reilly JJ. Objectively measured habitual physical activity in a highly obesogenic environment. *Child: Care, Health And Development* 2009;35(3):369-375.
154. McLure SA, Reilly JJ, Crooks S, Summerbell CD. Development and evaluation of a novel computer-based tool for assessing physical activity levels in schoolchildren. *Pediatr Exerc Sci* 2009;21(4):506-519.
155. McMurray RG, Ward DS, Elder JP, Lytle LA, Strikmiller PK, Baggett CD, Young DR. Do overweight girls overreport physical activity? *American Journal Of Health Behavior* 2008;32(5):538-546.
156. Metallinos-Katsaras ES, Freedson PS, Fulton JE, Sherry B. The association between an objective measure of physical activity and weight status in preschoolers. *Obesity* 2007;15(3):686-694.
157. Metcalf BS, Voss LD, Hosking J, Jeffery AN, Wilkin TJ. Physical activity at the government-recommended level and obesity-related health outcomes: a longitudinal study (Early Bird 37). *Arch Dis Child* 2008;93(9):772-777.
158. Metcalf BS, Jeffery AN, Hosking J, Voss LD, Sattar N, Wilkin TJ. Objectively measured physical activity and its association with adiponectin and other novel metabolic markers: a longitudinal study in children (EarlyBird 38). *Diabetes Care* 2009;32(3):468-473.
159. Mhurchu C, Maddison R, Jiang Y, Jull A, Prapavessis H, Rodgers A. Couch potatoes to jumping beans: A pilot study of the effect of active video games on physical activity in children. *Int J Behav Nutr Phys Act.* 2008;5(8).
160. Mitchell JA, Mattocks C, Ness AR, Leary SD, Pate RR, Dowda M, Blair SN, Riddoch C. Sedentary behavior and obesity in a large cohort of children. *Obesity* 2009;17(8):1596-1602.

161. Mitchell MS, Gaul CA, Naylor P-J, Panagiotopoulos C. Habitual moderate-to-vigorous physical activity is inversely associated with insulin resistance in Canadian first nations youth. *Pediatr Exerc Sci* 2010;22(2):254-265.
162. Møller NC, Kristensen PL, Wedderkopp N, Andersen LB, Froberg K. Objectively measured habitual physical activity in 1997/1998 vs 2003/2004 in Danish children: the European Youth Heart Study. *Scand J Med Sci Sports* 2009;19(1):19-29.
163. Moreira A, Delgado L, Haahtela T, Fonseca J, Moreira P, Lopes C, Mota J, Santos P, Ryttilä P, Castel-Branco MG. Physical training does not increase allergic inflammation in asthmatic children. *The European Respiratory Journal: Official Journal Of The European Society For Clinical Respiratory Physiology* 2008;32(6):1570-1575.
164. Morgan PJ, Okely AD, Cliff DP, Jones RA, Baur LA. Correlates of objectively measured physical activity in obese children. *Obesity (Silver Spring, Md.)* 2008;16(12):2634-2641.
165. Mota J, Silva P, Santos MP, Ribeiro JC, Oliveira J, Duarte JA. Physical activity and school recess time: differences between the sexes and the relationship between children's playground physical activity and habitual physical activity. *J Sports Sci.* 2005;23(3):269-275.
166. Mota J. Accelerometer cut-points and youth physical activity prevalence. *European Physical Education Review* 2007;13(3):287-299.
167. Mota J, Silva P, Aires L, Santos MP, Oliveira J, Ribeiro JC. Differences in school-day patterns of daily physical activity in girls according to level of physical activity. *J Phys Act Health.* 2008;5 Suppl 1:S90-S97.
168. Murray DM, Stevens J, Hannan PJ, Catellier DJ, Schmitz KH, Dowda M, Conway TL, Rice JC, Yang S. School-level intraclass correlation for physical activity in sixth grade girls. *Med Sci Sports Exerc.*2006;38(5):926-936.
169. Nader PR, Bradley RH, Houts RM, McRitchie SL, O'Brien M. Moderate-to-vigorous physical activity from ages 9 to 15 years. *JAMA* 2008;300(3):295-305.
170. Ness AR, Leary SD, Mattocks C, Blair SN, Reilly JJ, Wells J, Ingle S, Tilling K, Smith GD, Riddoch C. Objectively measured physical activity and fat mass in a large cohort of children. *Plos Medicine* 2007;4(3):e97-e97.
171. Niederer I, Kriemler S, Zahner L, Bürgi F, Ebenegger V, Hartmann T, Meyer U, Schindler C, Nydegger A, Marques-Vidal P and others. Influence of a lifestyle intervention in preschool children on physiological and psychological parameters (Ballabeina): study design of a cluster randomized controlled trial. *BMC Public Health* 2009;9:94-94.
172. Nilsson A, Anderssen SA, Andersen LB, Froberg K, Riddoch C, Sardinha LB, Ekelund U. Between- and within-day variability in physical activity and inactivity in 9- and 15-year-old European children. *Scand J Med Sci Sports* 2009;19(1):10-18.
173. Nilsson A, Andersen LB, Ommundsen Y, Froberg K, Sardinha LB, Piehl-Aulin K, Ekelund U. Correlates of objectively assessed physical activity and sedentary time in children: a cross-sectional study (The European Youth Heart Study). *BMC Public Health* 2009;9:322-322.
174. Noel SE, Mattocks C, Emmett P, Riddoch CJ, Ness AR, Newby PK. Use of accelerometer data in prediction equations for capturing implausible dietary intakes in adolescents. *Am J Clin Nutr* 2010;92(6):1436-1445.
175. Ortega F, Ruiz J, Sjöström M. Physical activity, overweight and central adiposity in Swedish children and adolescents: the European Youth Heart Study. *Int J Behav Nutr Phys Act .* 2007;4(61).
176. Ortega FB, Ruiz JR, Hurtig-Wennlöf A, Sjöström M. [Physically active adolescents are more likely to have a healthier cardiovascular fitness level independently of their adiposity status. The European youth heart study]. *Revista Española De Cardiología* 2008;61(2):123-129.
177. Owen CG, Nightingale CM, Rudnicka AR, Cook DG, Ekelund U, Whincup PH. Ethnic and gender differences in physical activity levels among 9-10-year-old children of white European, South Asian and African-Caribbean origin: the Child Heart Health Study in England (CHASE Study). *International Journal Of Epidemiology* 2009;38(4):1082-1093.
178. Paez S, Maloney A, Kelsey K, Wiesen C, Rosenberg A. Parental and environmental factors associated with physical activity among children participating in an active video game. *Pediatric Physical Therapy: The Official Publication Of The Section On Pediatrics Of The American Physical Therapy Association* 2009;21(3):245-253.
179. Page A, Cooper AR, Stamatakis E, Foster LJ, Crowne EC, Sabin M, Shield JPH. Physical activity patterns in nonobese and obese children assessed using minute-by-minute accelerometry. *Int J Obes* 2005;29(9):1070-1076.
180. Page AS, Cooper AR, Griew P, Davis L, Hillsdon M. Independent mobility in relation to weekday and weekend physical activity in children aged 10–11 years: The PEACH Project. *Int J Behav Nutr Phys Act .* Access 2009;6(2).
181. Pan C-Y, Frey GC. Physical activity patterns in youth with autism spectrum disorders. *Journal Of Autism And Developmental Disorders* 2006;36(5):597-606.
182. Pan C-Y. Objectively measured physical activity between children with autism spectrum disorders and children without disabilities during inclusive recess settings in Taiwan. *Journal Of Autism And Developmental Disorders* 2008;38(7):1292-1301.
183. Pan C-Y. School time physical activity of students with and without autism spectrum disorders during PE and recess. *Adapted Physical Activity Quarterly: APAQ* 2008;25(4):308-321.
184. Pate RR, Stevens J, Pratt C, Sallis JF, Schmitz KH, Webber LS, Welk G, Young DR. Objectively measured physical activity in sixth-grade girls. *Arch Pediatr Adolesc Med* 2006;160(12):1262-1268.
185. Pate RR, Stevens J, Webber LS, Dowda M, Murray DM, Young DR, Going S. Age-related change in physical activity in adolescent girls. *J Adolesc Health* 2009;44(3):275-282.

186. Patnode C, Lytle L, Erickson D, Sirard J, Barr-Anderson D, Story M. The relative influence of demographic, individual, social, and environmental factors on physical activity among boys and girls. *Int J Behav Nutr Phys Act* 2010;7(79).
187. Patrick K, Calfas KJ, Norman GJ, Zabinski MF, Sallis JF, Rupp J, Covin J, Cella J. Randomized controlled trial of a primary care and home-based intervention for physical activity and nutrition behaviors: PACE+ for adolescents. *Arch Pediatr Adolesc Med* 2006;160(2):128-136.
188. Pearson N, Atkin A, Biddle S, Gorely T, Edwardson C. Patterns of adolescent physical activity and dietary behaviours. *Int J Behav Nutr Phys Act* 2009;6(45).
189. Pfeiffer KA, Dowda M, McIver KL, Pate RR. Factors related to objectively measured physical activity in preschool children. *Pediatr Exerc Sci* 2009;21(2):196-208.
190. Philippaerts RM, Matton L, Wijndaele K, Balduck AL, De Bourdeaudhuij I, Lefevre J. Validity of a physical activity computer questionnaire in 12- to 18-year-old boys and girls. *International Journal Of Sports Medicine* 2006;27(2):131-136.
191. Prista A, Nhantumbo L, Silvio S, Lopes V, Maia J, André e S, Vinagre J, Conn CA, Beunen G. Physical activity assessed by accelerometry in rural African school-age children and adolescents. *Pediatr Exerc Sci* 2009;21(4):384-399.
192. Purslow LR, Hill C, Saxton J, Corder K, Wardle J. Differences in physical activity and sedentary time in relation to weight in 8-9 year old children. *Int J Behav Nutr Phys Act* 2008;5:67.
193. Purslow LR, van Jaarsveld CHM, Semmler C, Wardle J. Validity and prognostic value of parental ratings of children's activity. *Prev Med* 2009;49(1):28-31.
194. Quigg R, Gray A, Reeder AI, Holt A, Waters DL. Using accelerometers and GPS units to identify the proportion of daily physical activity located in parks with playgrounds in New Zealand children. *Prev Med* 2010;50(5-6):235-240.
195. Reilly JJ, Kelly L, Montgomery C, Williamson A, Fisher A, McColl JH, Lo Conte R, Paton JY, Grant S. Physical activity to prevent obesity in young children: cluster randomised controlled trial. *BMJ (Clinical Research Ed.)* 2006;333(7577):1041-1041.
196. Riddoch CJ, Mattocks C, Deere K, Saunders J, Kirkby J, Tilling K, Leary SD, Blair SN, Ness AR. Objective measurement of levels and patterns of physical activity. *Arch Dis Child* 2007;92(11):963-969.
197. Riddoch CJ, Leary SD, Ness AR, Blair SN, Deere K, Mattocks C, Griffiths A, Davey Smith G, Tilling K. Prospective associations between objective measures of physical activity and fat mass in 12-14 year old children: the Avon Longitudinal Study of Parents and Children (ALSPAC). *BMJ (Clinical Research Ed.)* 2009;339:b4544-b4544.
198. Ridgers ND, Tóth M, Uvacek M. Physical activity levels of Hungarian children during school recess. *Prev Med* 2009;49(5):410-412.
199. Ries AV, Voorhees CC, Roche KM, Gittelsohn J, Yan AF, Astone NM. A quantitative examination of park characteristics related to park use and physical activity among urban youth. *J Adolesc Health* 2009;45(3 Suppl):S64-S70.
200. Rizzo NS, Ruiz JR, Hurtig-Wennlöf A, Ortega FB, Sjöström M. Relationship of physical activity, fitness, and fatness with clustered metabolic risk in children and adolescents: the European youth heart study. *J Pediatr* 2007;150(4):388-394.
201. Rizzo NS, Ruiz JR, Oja L, Veidebaum T, Sjöström M. Associations between physical activity, body fat, and insulin resistance (homeostasis model assessment) in adolescents: the European Youth Heart Study. *Am J Clin Nutr* 2008;87(3):586-592.
202. Rodrigues Machado AM, Coelho e Silva MJ, Mota J, Cumming SP, Sherar LB, Neville H, Malina RM. Confounding effect of biologic maturation on sex differences in physical activity and sedentary behavior in adolescents. *Pediatr Exerc Sci* 2010;22(3):442-453.
203. Roemmich JN, Epstein LH, Raja S, Yin L, Robinson J, Winiewicz D. Association of access to parks and recreational facilities with the physical activity of young children. *Prev Med* 2006;43(6):437-441.
204. Ross KR, Hart MA, Storfer-Isser A, Kibler AMV, Johnson NL, Rosen CL, Kerckmar CM, Redline S. Obesity and obesity related co-morbidities in a referral population of children with asthma. *Pediatric Pulmonology* 2009;44(9):877-884.
205. Rowlands AV, Pilgrim EL, Eston RG. Patterns of habitual activity across weekdays and weekend days in 9-11-year-old children. *Prev Med* 2008;46(4):317-324.
206. Rowlands AV, Pilgrim EL, Eston RG. Seasonal changes in children's physical activity: an examination of group changes, intra-individual variability and consistency in activity pattern across season. *Annals Of Human Biology* 2009;36(4):363-378.
207. Ruiz JR, Rizzo NS, Hurtig-Wennlöf A, Ortega FB, Wärnberg J, Sjöström M. Relations of total physical activity and intensity to fitness and fatness in children: the European Youth Heart Study. *Am J Clin Nutr* 2006;84(2):299-303.
208. Ruiz JR, Ortega FB, Warnberg J, Sjöström M. Associations of low-grade inflammation with physical activity, fitness and fatness in prepubertal children; the European Youth Heart Study. *Int J Obes* 2007;31(10):1545-1551.
209. Ruiz JR, Hurtig-Wennlöf A, Ortega FB, Patterson E, Nilsson TK, Castillo MJ, Sjöström M. Homocysteine levels in children and adolescents are associated with the methylenetetrahydrofolate reductase 677C>T genotype, but not with physical activity, fitness or fatness: the European Youth Heart Study. *The British Journal Of Nutrition* 2007;97(2):255-262.
210. Rushovich B, Voorhees C, Davis C, Neumark-Sztainer D, Pfeiffer K., Elder J, Going S, Marino V. The relationship between unsupervised time after school and physical activity in adolescent girls. *Int J Behav Nutr Phys Act* 2006;3(20).

211. Saelens BE, Seeley RJ, van Schaick K, Donnelly LF, O'Brien KJ. Visceral abdominal fat is correlated with whole-body fat and physical activity among 8-y-old children at risk of obesity. *Am J Clin Nutr* 2007;85(1):46-53.
212. Saksvig BI, Catellier DJ, Pfeiffer K, Schmitz KH, Conway T, Going S, Ward D, Strikmiller P, Treuth MS. Travel by walking before and after school and physical activity among adolescent girls. *Arch Pediatr Adolesc Med* 2007;161(2):153-158.
213. Salmon J, Timperio A, Telford A, Carver A, Crawford D. Association of family environment with children's television viewing and with low level of physical activity. *Obes Res* 2005;13(11):1939-1951.
214. Salmon J, Campbell KJ, Crawford DA. Television viewing habits associated with obesity risk factors: a survey of Melbourne schoolchildren. *The Medical Journal Of Australia* 2006;184(2):64-67.
215. Salmon J. Factors in youth physical activity participation: from psychological aspects to environmental correlates. *Research In Sports Medicine* 2010;18(1):26-36.
216. Sanchez A, Norman GJ, Sallis JF, Calfas KJ, Cella J, Patrick K. Patterns and correlates of physical activity and nutrition behaviors in adolescents. *Am J Prev Med* 2007;32(2):124-130.
217. Sardinha LB, Andersen LB, Anderssen SA, Quitério AL, Ornelas R, Froberg K, Riddoch CJ, Ekelund U. Objectively measured time spent sedentary is associated with insulin resistance independent of overall and central body fat in 9- to 10-year-old Portuguese children. *Diabetes Care* 2008;31(3):569-575.
218. Sardinha LB, Baptista F, Ekelund U. Objectively measured physical activity and bone strength in 9-year-old boys and girls. *Pediatrics* 2008;122(3):e728-e736.
219. Särnblad S, Ekelund U, Aman J. Physical activity and energy intake in adolescent girls with Type 1 diabetes. *Diabetic Medicine* 2005;22(7):893-899.
220. Schneider M, Dunn A, Cooper D. Affect, exercise, and physical activity among healthy adolescents. *Journal Of Sport & Exercise Psychology* 2009;31(6):706-723.
221. Scott MM, Cohen DA, Evenson KR, Elder J, Catellier D, Ashwood JS, Overton A. Weekend schoolyard accessibility, physical activity, and obesity: the Trial of Activity in Adolescent Girls (TAAG) study. *Prev Med* 2007;44(5):398-403.
222. Scott MM, Evenson KR, Cohen DA, Cox CE. Comparing perceived and objectively measured access to recreational facilities as predictors of physical activity in adolescent girls. *Journal Of Urban Health* 2007;84(3):346-359.
223. Sherar LB, Esliger DW, Baxter-Jones ADG, Tremblay MS. Age and gender differences in youth physical activity: does physical maturity matter? *Med Sci Sports Exerc.*2007;39(5):830-835.
224. Shoup JA, Gattshall M, Dandamudi P, Estabrooks P. Physical activity, quality of life, and weight status in overweight children. *Quality Of Life Research* 2008;17(3):407-412.
225. Sirard JR, Riner WF, Jr., McIver KL, Pate RR. Physical activity and active commuting to elementary school. *Med Sci Sports Exerc* 2005;37(12):2062-2069.
226. Sirard, JR, Kubik, MY, Fulkerson, JA, Arcan, C. Objectively Measured Physical Activity in Urban Alternative High School Students. *Med Sci Sports Exerc.* 2008; 40(12): 2088–2095.
227. Sirard JR, Slater ME. Compliance with wearing physical activity accelerometers in high school students. *J Phys Act Health.* 2009;6(Suppl 1):S148-S155.
228. Sirard J, Laska M, Patnode C, Farbakhsh K, Lytle L. Adolescent physical activity and screentime: associations with the physical home environment. *Int J Behav Nutr Phys Act*2010;7(82).
229. Steele RM, van Sluijs EMF, Cassidy A, Griffin SJ, Ekelund U. Targeting sedentary time or moderate- and vigorous-intensity activity: independent relations with adiposity in a population-based sample of 10-y-old British children. *Am J Clin Nutr* 2009;90(5):1185-1192.
230. Steele R, van Sluijs E, Sharp S, Landsbaugh J, Ekelund U, Griffin S. An investigation of patterns of children's sedentary and vigorous physical activity throughout the week. *Int J Behav Nutr Phys Act* 2010;7(88).
231. Stevens J, Murray DM, Baggett CD, Elder JP, Lohman TG, Lytle LA, Pate RR, Pratt CA, Treuth MS, Webber LS and others. Objectively assessed associations between physical activity and body composition in middle-school girls: the Trial of Activity for Adolescent Girls. *Am J Epidemiol* 2007;166(11):1298-1305.
232. Stone MR, Rowlands AV, Eston RG. Characteristics of the activity pattern in normal weight and overweight boys. *Prev Med* 2009;49(2-3):205-208.
233. Stone MR, Rowlands AV, Middlebrooke AR, Jawis MN, Eston RG. The pattern of physical activity in relation to health outcomes in boys. *Int J Pediatr Obes.* 2009;4(4):306-315.
234. Taber DR, Stevens J, Murray DM, Elder JP, Webber LS, Jobe JB, Lytle LA. The effect of a physical activity intervention on bias in self-reported activity. *Annals Of Epidemiology* 2009;19(5):316-322.
235. Thompson AM, Campagna PD, Rehman LA, Murphy RJL, Rasmussen RL, Ness GW. Physical activity and body mass index in grade 3, 7, and 11 Nova Scotia students. *Med Sci Sports Exerc.*2005;37(11):1902-1908.
236. Thompson AM, Campagna PD, Durant M, Murphy RJL, Rehman LA, Wadsworth LA. Are overweight students in Grades 3, 7, and 11 less physically active than their healthy weight counterparts? *Int J Pediatr Obes.* 2009;4(1):28-35.
237. Thompson AM, McHugh T-L, Blanchard CM, Campagna PD, Durant MA, Rehman LA, Murphy RJL, Wadsworth LA. Physical activity of children and youth in Nova Scotia from 2001/02 and 2005/06. *Prev Med* 2009;49(5):407-409.
238. Timperio A, Giles-Corti B, Crawford D, Andrianopoulos N, Ball K, Salmon J, Hume C. Features of public open spaces and physical activity among children: findings from the CLAN study. *Prev Med* 2008;47(5):514-518.
239. Tobias JH, Steer CD, Mattocks CG, Riddoch C, Ness AR. Habitual levels of physical activity influence bone mass in 11-year-old children from the United Kingdom: findings from a large population-based cohort. *Journal Of Bone And Mineral Research* 2007;22(1):101-109.

240. Trayers T, Cooper AR, Riddoch CJ, Ness AR, Fox KR, Deem R, Lawlor DA. Do children from an inner city British school meet the recommended levels of physical activity? Results from a cross sectional survey using objective measurements of physical activity. *Arch Dis Child* 2006;91(2):175-176.
241. Tremblay MS, Barnes JD, Copeland JL, Esliger DW. Conquering childhood inactivity: is the answer in the past? *Med Sci Sports Exerc.*2005;37(7):1187-1194.
242. Treuth MS, Catellier DJ, Schmitz KH, Pate RR, Elder JP, McMurray RG, Blew RM, Yang S, Webber L. Weekend and weekday patterns of physical activity in overweight and normal-weight adolescent girls. *Obesity* 2007;15(7):1782-1788.
243. Treuth MS, Baggett CD, Pratt CA, Going SB, Elder JP, Charneco EY, Webber LS. A longitudinal study of sedentary behavior and overweight in adolescent girls. *Obesity* 2009;17(5):1003-1008.
244. Trigona B, Aggoun Y, Maggio A, Martin XE, Marchand LM, Beghetti M, Farpour-Lambert NJ. Preclinical noninvasive markers of atherosclerosis in children and adolescents with type 1 diabetes are influenced by physical activity. *J Pediatr*2010;157(4):533-539.
245. Troiano RP, Berrigan D, Dodd KW, Mâsse LC, Tilert T, McDowell M. Physical activity in the United States measured by accelerometer. *Med Sci Sports Exerc.*2008;40(1):181-188.
246. Troped PJ, Wiecha JL, Fragala MS, Matthews CE, Finkelstein DM, Kim J, Peterson KE. Reliability and validity of YRBS physical activity items among middle school students. *Med Sci Sports Exerc.*2007;39(3):416-425.
247. Vale S, Santos R, Silva P, Soares-Miranda L, Mota J. Preschool children physical activity measurement: importance of epoch length choice. *Pediatr Exerc Sci* 2009;21(4):413-420.
248. Vale S, Silva P, Santos R, Soares-Miranda L, Mota J. Compliance with physical activity guidelines in preschool children. *J Sports Sci.* 2010;28(6):603-608.
249. Van Cauwenberghe E, Labarque V, Trost SG, Bourdeaudhuij I de, Cardon G. *Int J Pediatr Obes.* 2011; 6(2-2): e582-e589
250. Van Coevering P, Harnack L, Schmitz K, Fulton JE, Galuska DA, Gao S. Feasibility of using accelerometers to measure physical activity in young adolescents. *Med Sci Sports Exerc.*2005;37(5):867-871.
251. van Sluijs EMF. Behavioural and social correlates of sedentary time in young people. *Br J Sports Med*2008;44(10):747-55.
252. van Sluijs EMF, Skidmore PML, Mwanza K, Jones AP, Callaghan AM, Ekelund U, Harrison F, Harvey I, Panter J, Wareham NJ and others. Physical activity and dietary behaviour in a population-based sample of British 10-year old children: the SPEEDY study (Sport, Physical activity and Eating behaviour: environmental Determinants in Young people). *BMC Public Health* 2008;8:388-388.
253. van Sluijs EMF, Fearne VA, Mattocks C, Riddoch C, Griffin SJ, Ness A. The contribution of active travel to children's physical activity levels: cross-sectional results from the ALSPAC study. *Prev Med* 2009;48(6):519-524.
254. Verstraete SJM, Cardon GM, De Clercq DLR, De Bourdeaudhuij IMM. A comprehensive physical activity promotion programme at elementary school: the effects on physical activity, physical fitness and psychosocial correlates of physical activity. *Public Health Nutrition* 2007;10(5):477-484.
255. Voorhees CC, Catellier DJ, Ashwood JS, Cohen DA, Rung A, Lytle L, Conway TL, Dowda M. Neighborhood socioeconomic status and non school physical activity and body mass index in adolescent girls. *J Phys Act Health.* 2009;6(6):731-740.
256. Voss LD, Hosking J, Metcalf BS, Jeffery AN, Wilkin TJ. Children from low-income families have less access to sports facilities, but are no less physically active: cross-sectional study (EarlyBird 35). *Child: Care, Health And Development* 2008;34(4):470-474.
257. Watson K, Baranowski T, Thompson D, Jago R, Baranowski J, Klesges LM. Innovative application of a multidimensional item response model in assessing the influence of social desirability on the pseudo-relationship between self-efficacy and behavior. *Health Education Research* 2006;21 Suppl 1:i85-i97.
258. Webber LS, Catellier DJ, Lytle LA, Murray DM, Pratt CA, Young DR, Elder JP, Lohman TG, Stevens J, Jobe JB and others. Promoting physical activity in middle school girls: Trial of Activity for Adolescent Girls. *Am J Prev Med* 2008;34(3):173-84.
259. Wedderkopp N, Kjaer P, Hestbaek L, Korsholm L, Leboeuf-Yde C. High-level physical activity in childhood seems to protect against low back pain in early adolescence. *The Spine Journal* 2009;9(2):134-141.
260. Weintraub DL, Tirumalai EC, Haydel KF, Fujimoto M, Fulton JE, Robinson TN. Team sports for overweight children: the Stanford Sports to Prevent Obesity Randomized Trial (SPORT). *Arch Pediatr Adolesc Med* 2008;162(3):232-237.
261. Welk GJ, Wickel E, Peterson M, Heitzler CD, Fulton JE, Potter LD. Reliability and validity of questions on the youth media campaign longitudinal survey. *Med Sci Sports Exerc.*2007;39(4):612-621.
262. Wen LM, van der Ploeg HP, Kite J, Cashmore A, Rissel C. A validation study of assessing physical activity and sedentary behavior in children aged 3 to 5 years. *Pediatr Exerc Sci* 2010;22(3):408-420.
263. Wennlöf AH, Yngve A, Nilsson TK, Sjöström M. Serum lipids, glucose and insulin levels in healthy schoolchildren aged 9 and 15 years from Central Sweden: reference values in relation to biological, social and lifestyle factors. *Scandinavian Journal Of Clinical And Laboratory Investigation* 2005;65(1):65-76.
264. Wenthe PJ, Janz KF, Levy SM. Gender similarities and differences in factors associated with adolescent moderate-vigorous physical activity. *Pediatr Exerc Sci* 2009;21(3):291-304.
265. Wheeler BW, Cooper AR, Page AS, Jago R. Greenspace and children's physical activity: a GPS/GIS analysis of the PEACH project. *Prev Med* 2010;51(2):148-152.
266. Whitt-Glover MC, Taylor WC, Floyd MF, Yore MM, Yancey AK, Matthews CE. Disparities in physical activity and sedentary behaviors among US children and adolescents: prevalence, correlates, and intervention implications. *Journal Of Public Health Policy* 2009;30 Suppl 1:S309-S334.

267. Wickel EE, Eisenmann JC, Welk GJ. Maturity-related variation in moderate-to-vigorous physical activity among 9-14 year olds. *J Phys Act Health*. 2009;6(5):597-605.
268. Wilkin TJ, Mallam KM, Metcalf BS, Jeffery AN, Voss LD. Variation in physical activity lies with the child, not his environment: evidence for an 'activitystat' in young children (EarlyBird 16). *Int J Obes* 2006;30(7):1050-1055.
269. Williams HG, Pfeiffer KA, O'Neill JR, Dowda M, McIver KL, Brown WH, Pate RR. Motor skill performance and physical activity in preschool children. *Obesity* (Silver Spring, Md.) 2008;16(6):1421-1426.
270. Wilson DK, Evans AE, Williams J, Mixon G, Sirard JR, Pate R. A preliminary test of a student-centered intervention on increasing physical activity in underserved adolescents. *Ann Behav Med* 2005;30(2):119-124.
271. Wong SL, Leatherdale ST, Manske SR. Reliability and validity of a school-based physical activity questionnaire. *Med Sci Sports Exerc*.2006;38(9):1593-1600.
272. Wrotniak BH, Epstein LH, Dorn JM, Jones KE, Kondilis VA. The relationship between motor proficiency and physical activity in children. *Pediatrics* 2006;118(6):e1758-e1765.
273. Zahner L, Puder JJ, Roth R, Schmid M, Guldimann R, Pühse U, Knöpfli M, Braun-Fahländer C, Marti B, Kriemler S. A school-based physical activity program to improve health and fitness in children aged 6-13 years ("Kinder-Sportstudie KISS"): study design of a randomized controlled trial [ISRCTN15360785]. *BMC Public Health* 2006;6:147-147.
274. Corder K, Brage S, Ramachandran A, Snehalatha C, Wareham N, Ekelund U. Comparison of two Actigraph models for assessing free-living physical activity in Indian adolescents. *J Sports Sci* 2007; 25: 1607-1611.
275. Sirard J, Welk G, Heitzler C, Lytle L. Youth accelerometer cutoffs for moderate-to-vigorous physical activity: A sensitivity analysis. *Med Sci Sports Exer*. 2009; 41:S314
276. Telford Jo Salmon, Damien Jolley, and David Crawford. 2004 Reliability and Validity of Physical Activity Questionnaires for Children: The Children's Leisure Activities Study Survey (CLASS). *Ped Exer Science* 2004;16: 64-78
